# Supplementary material for: GENCODE: massively expanding the lncRNA catalog through capture long-read RNA sequencing
Source: PubMed Central journal article supplement (PMC11565817; doi:10.1101/2024.10.29.620654), 2024-10-31

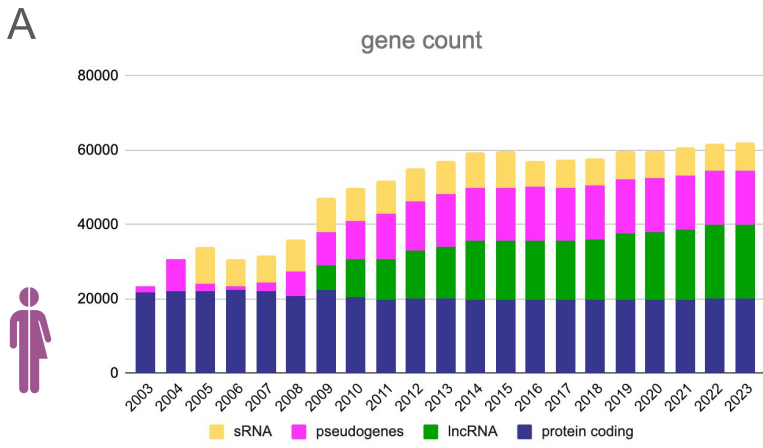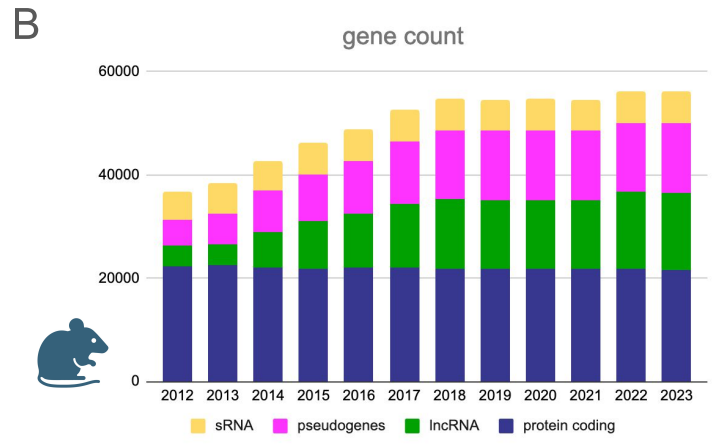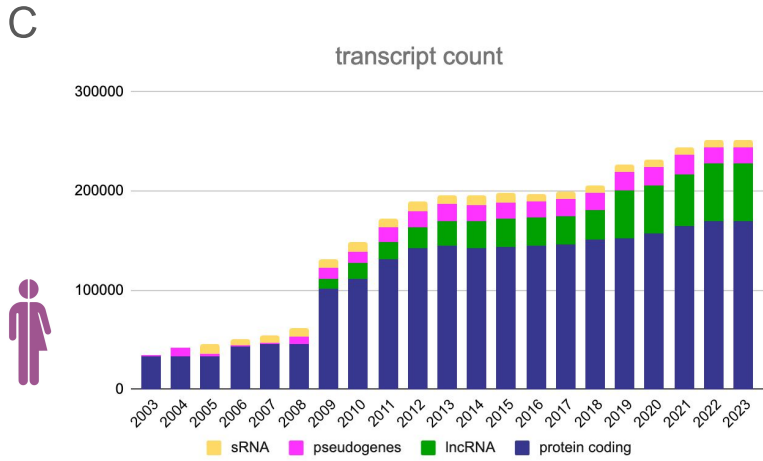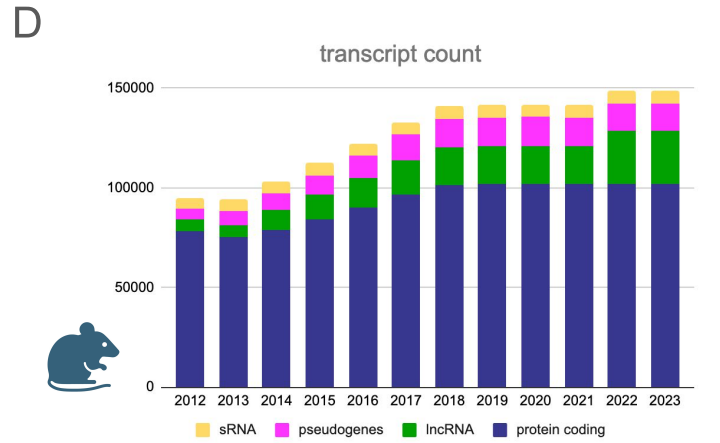

Fig S1

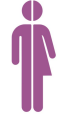

pre-capture

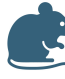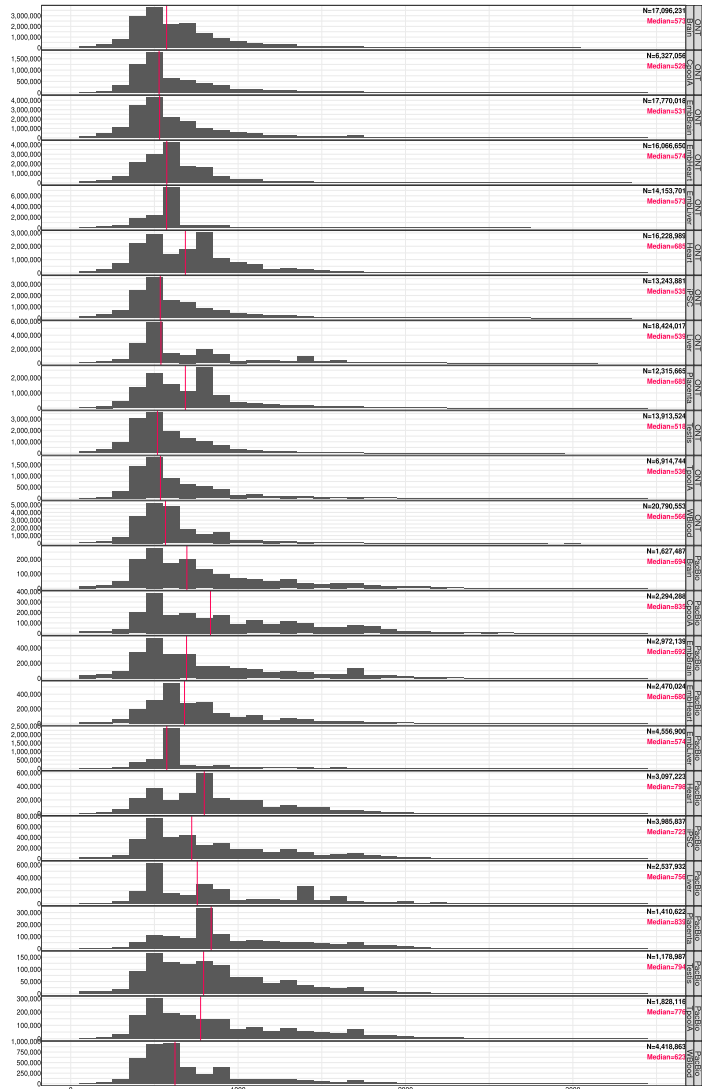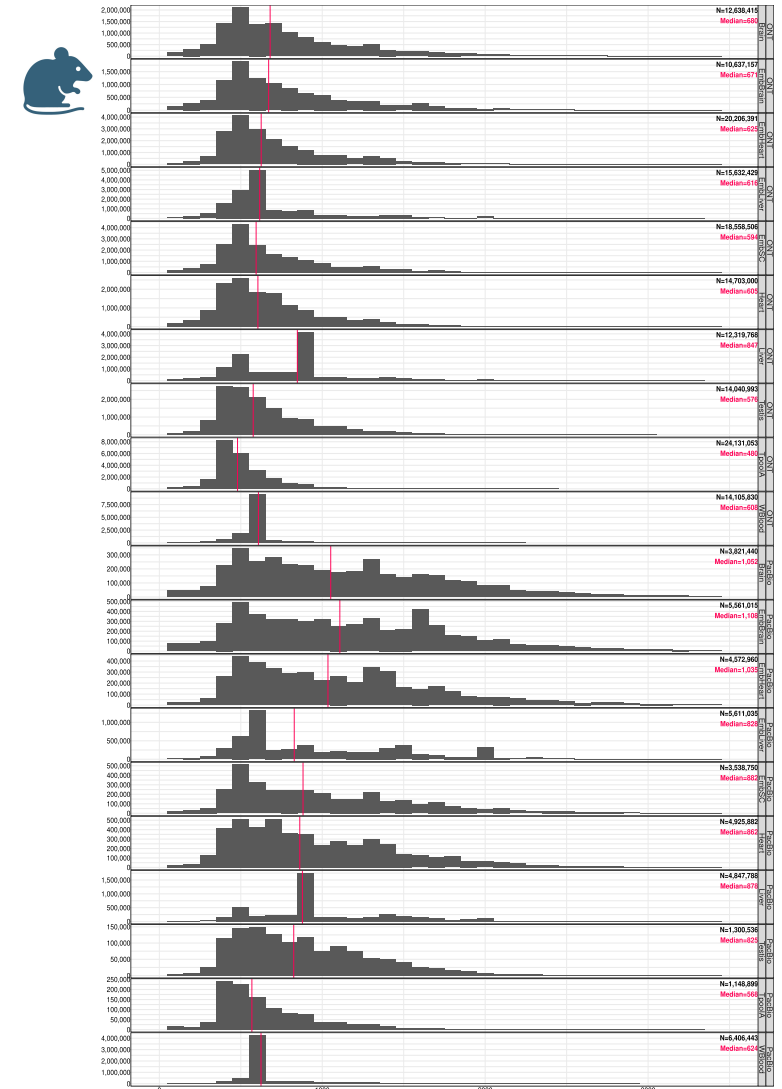

post-capture

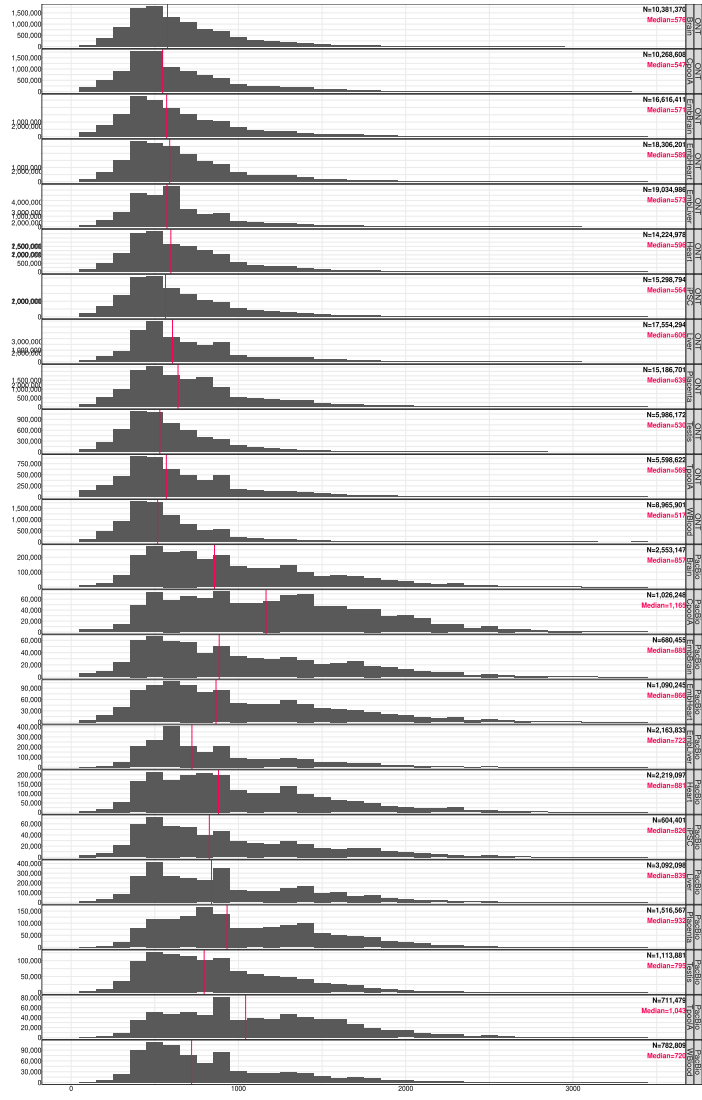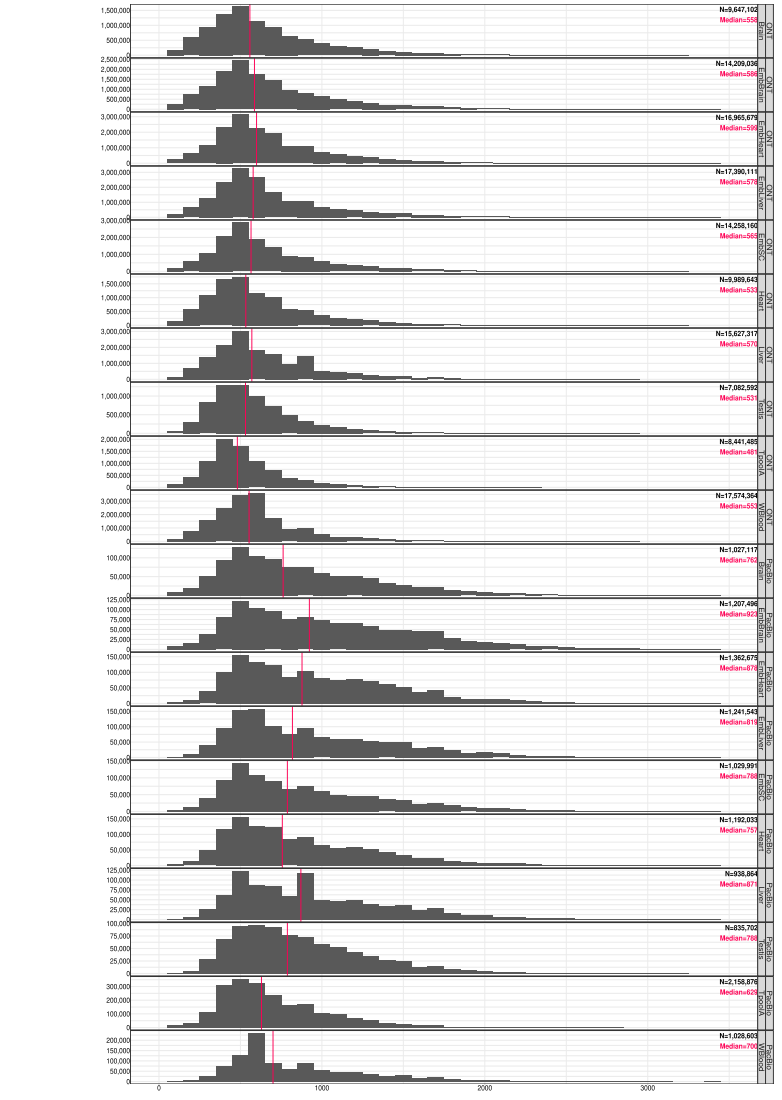

Figure S2

**A**

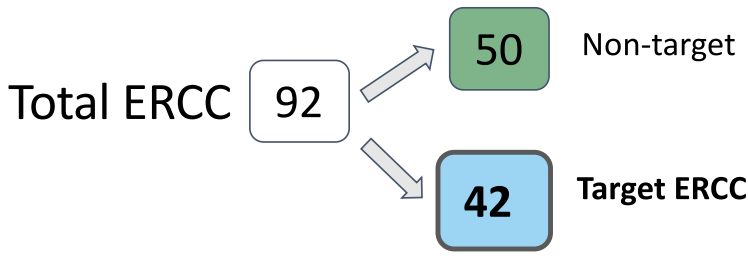

pre-capture  
post-capture

**B**

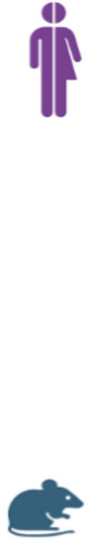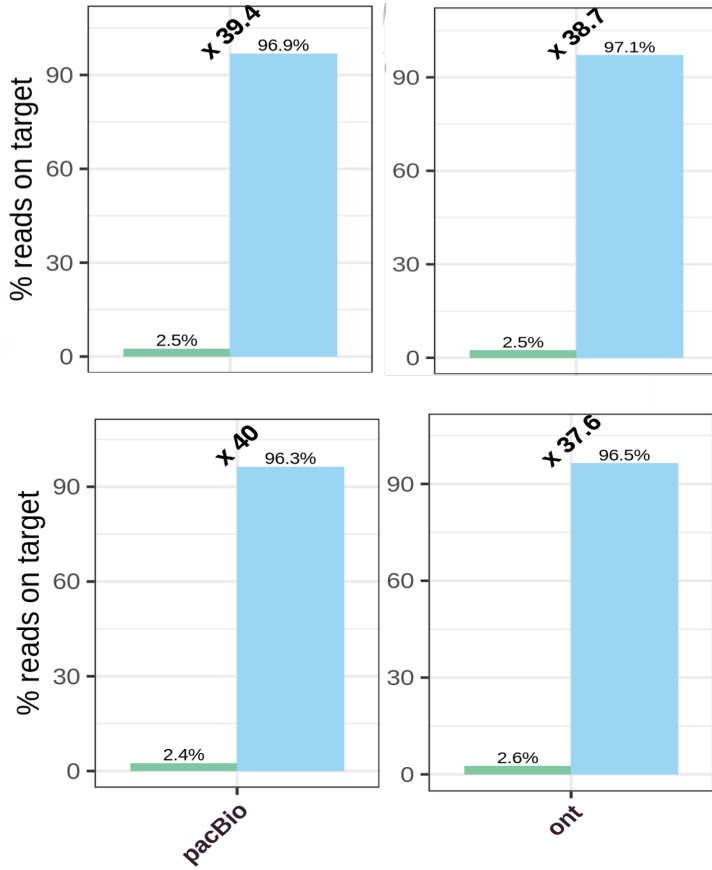

**C**

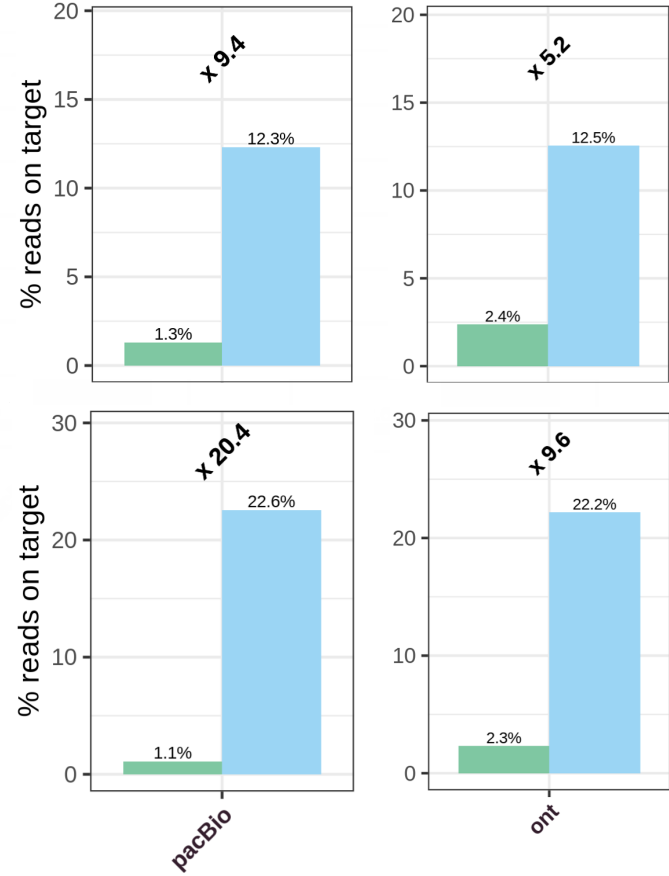

**D**

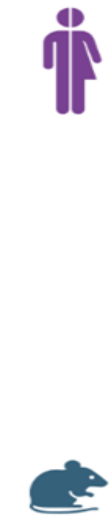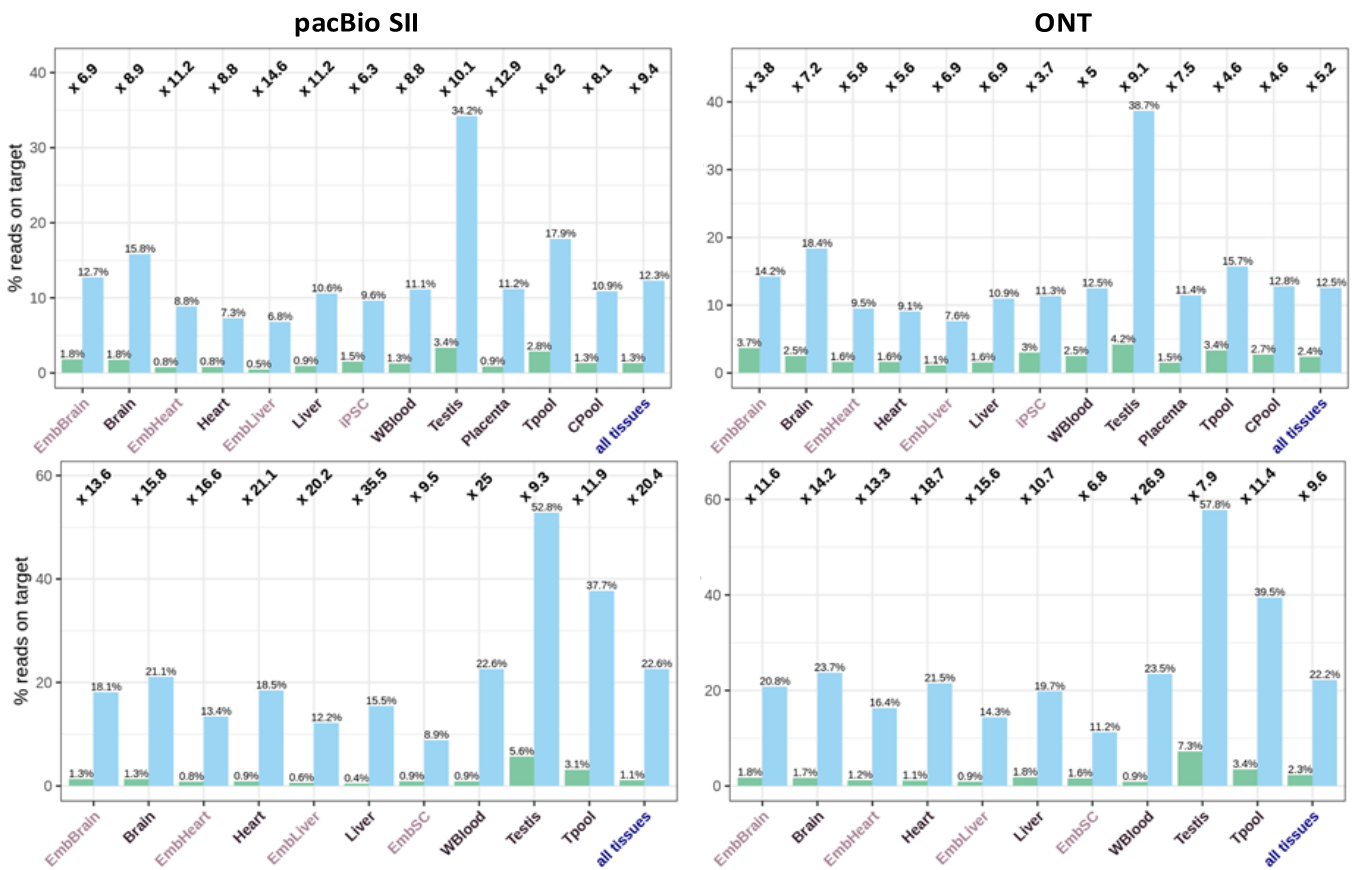

Fig S4

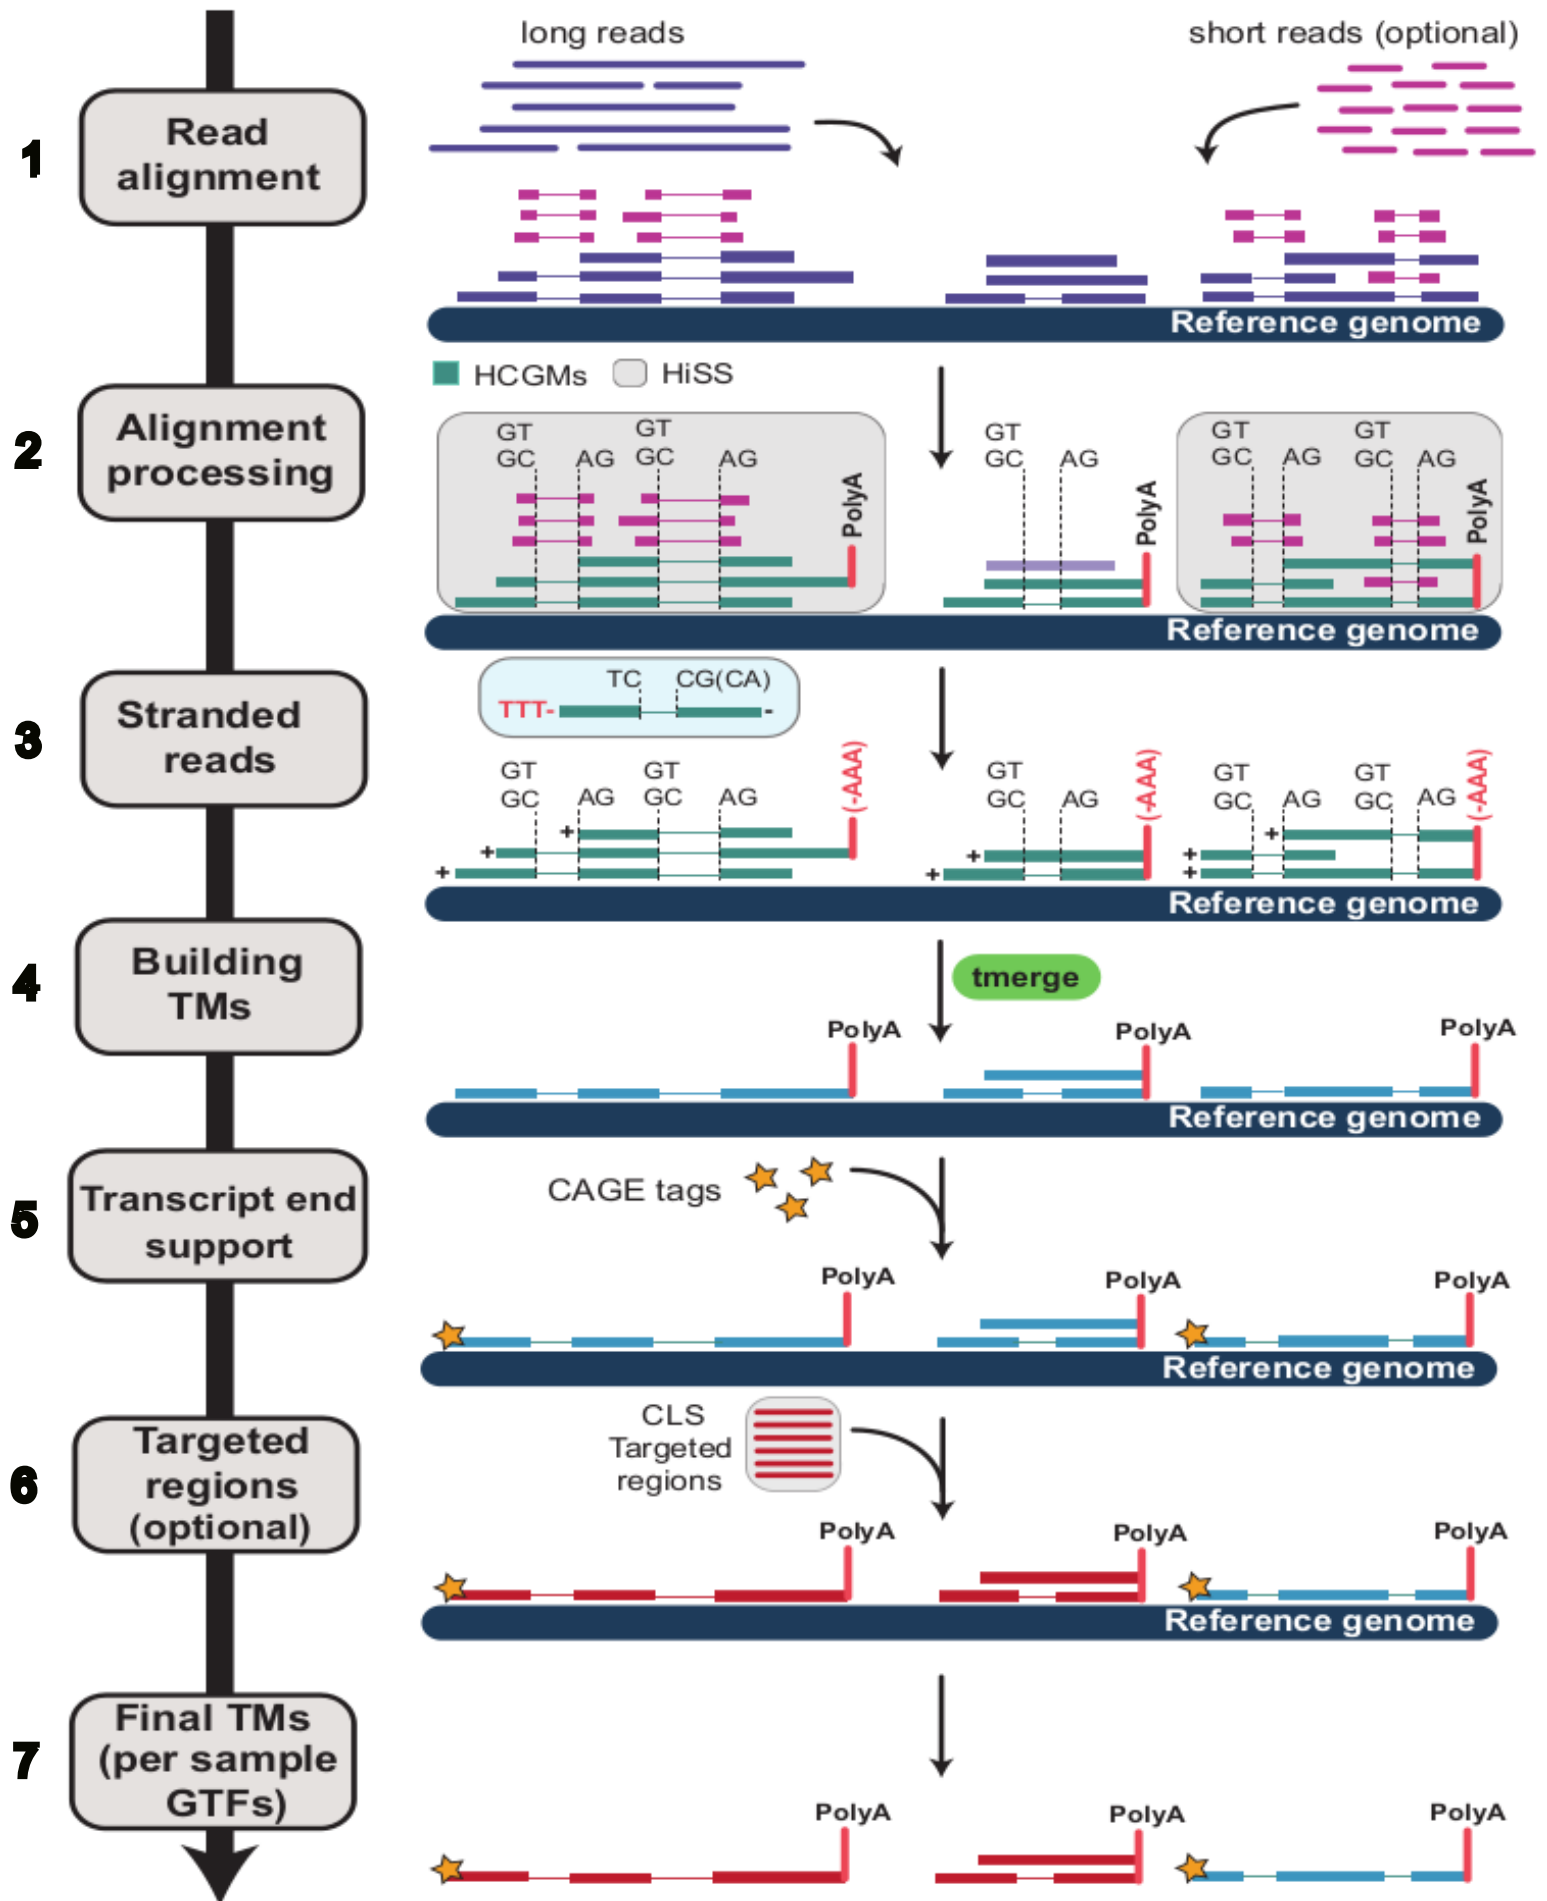

# Fig S5

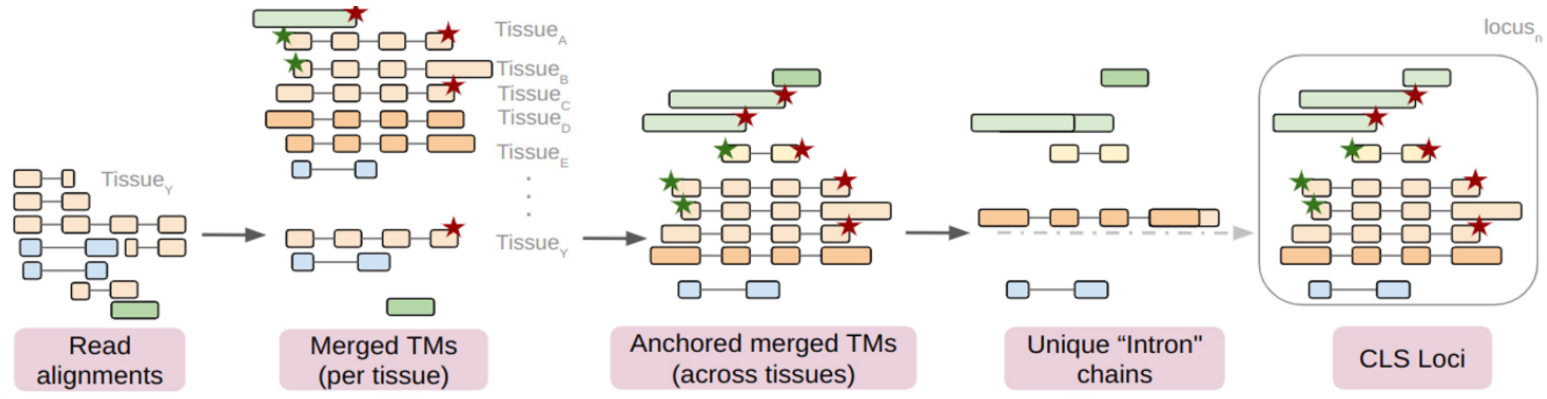

# Fig S6

## A

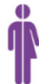

### CLS transcript models

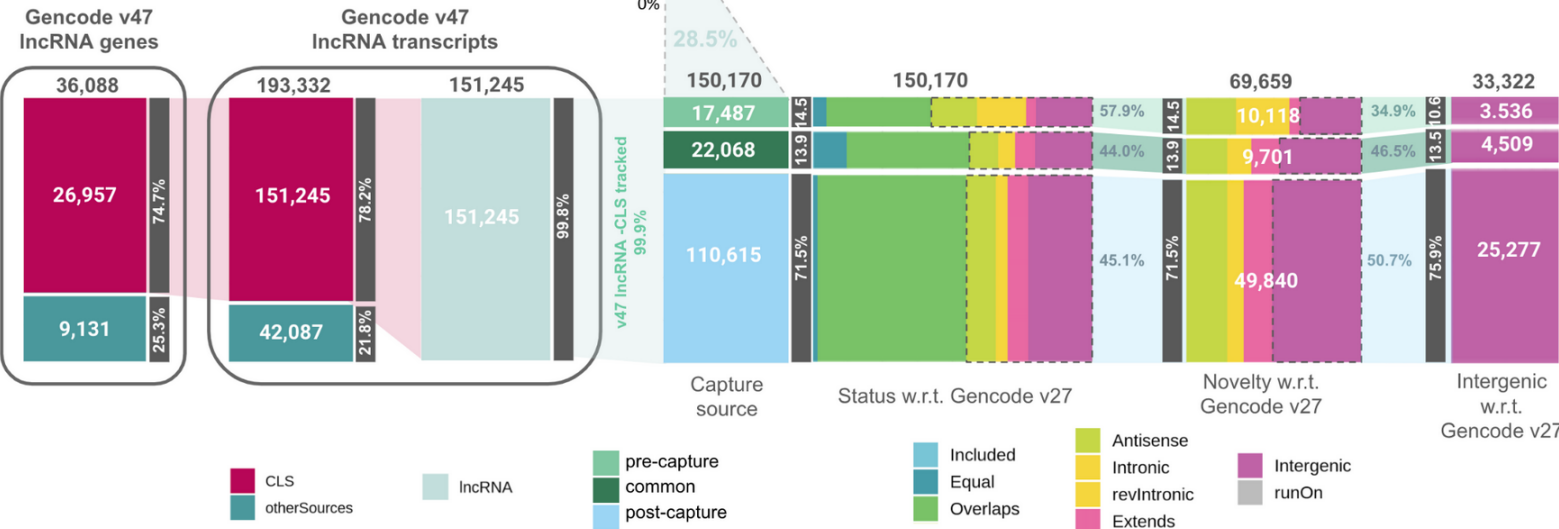

## B

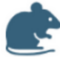

### CLS transcript models

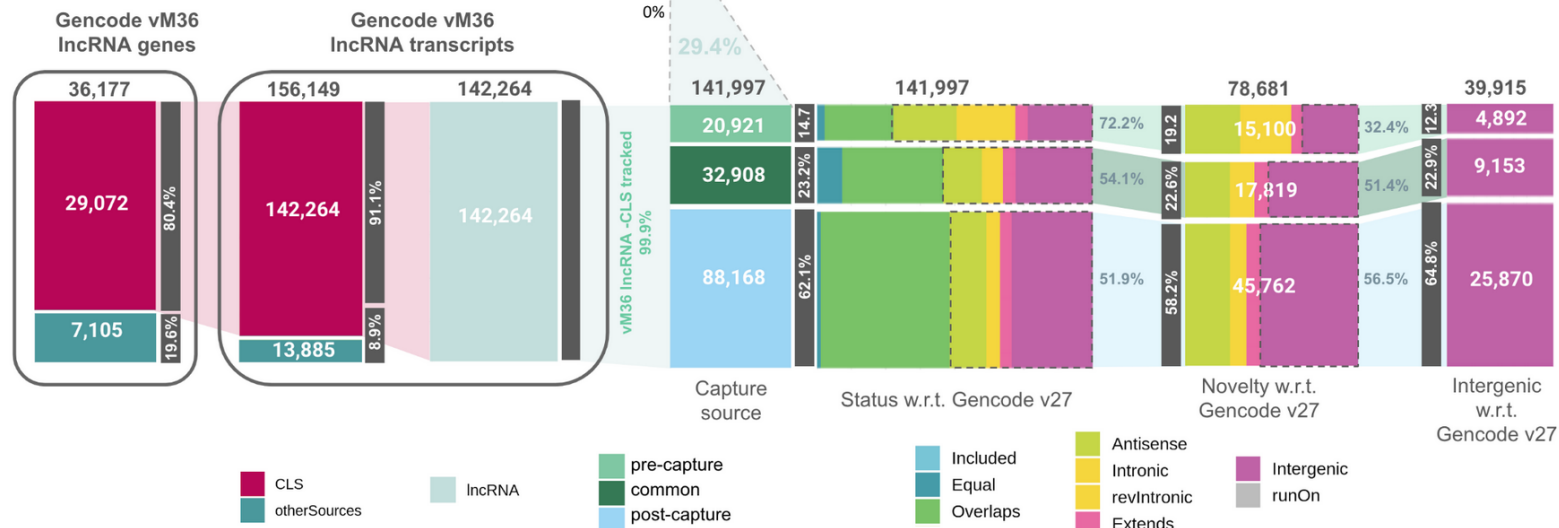

# Fig S7

## A

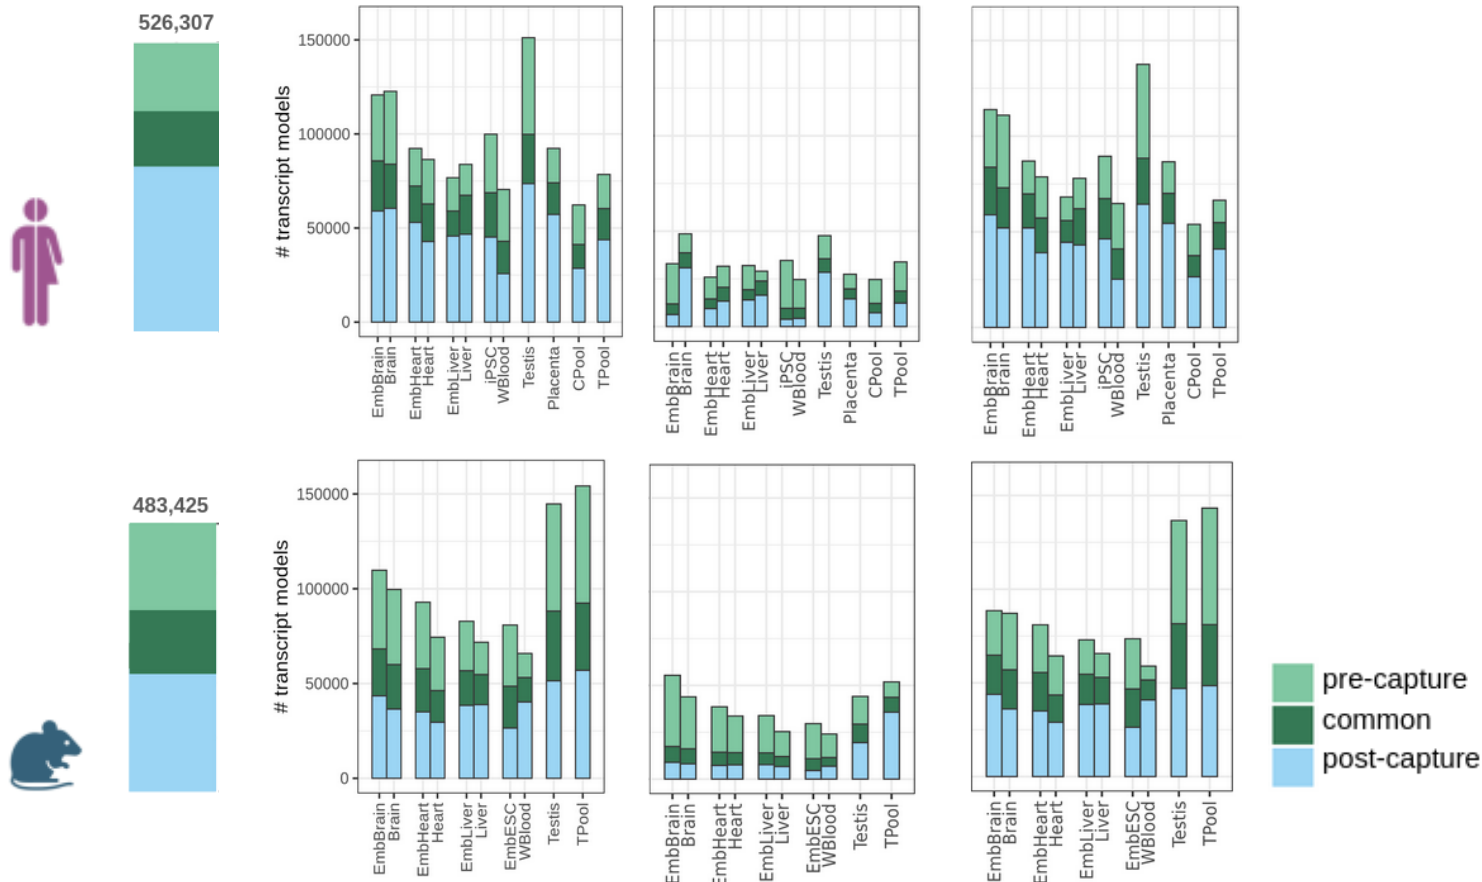

## B

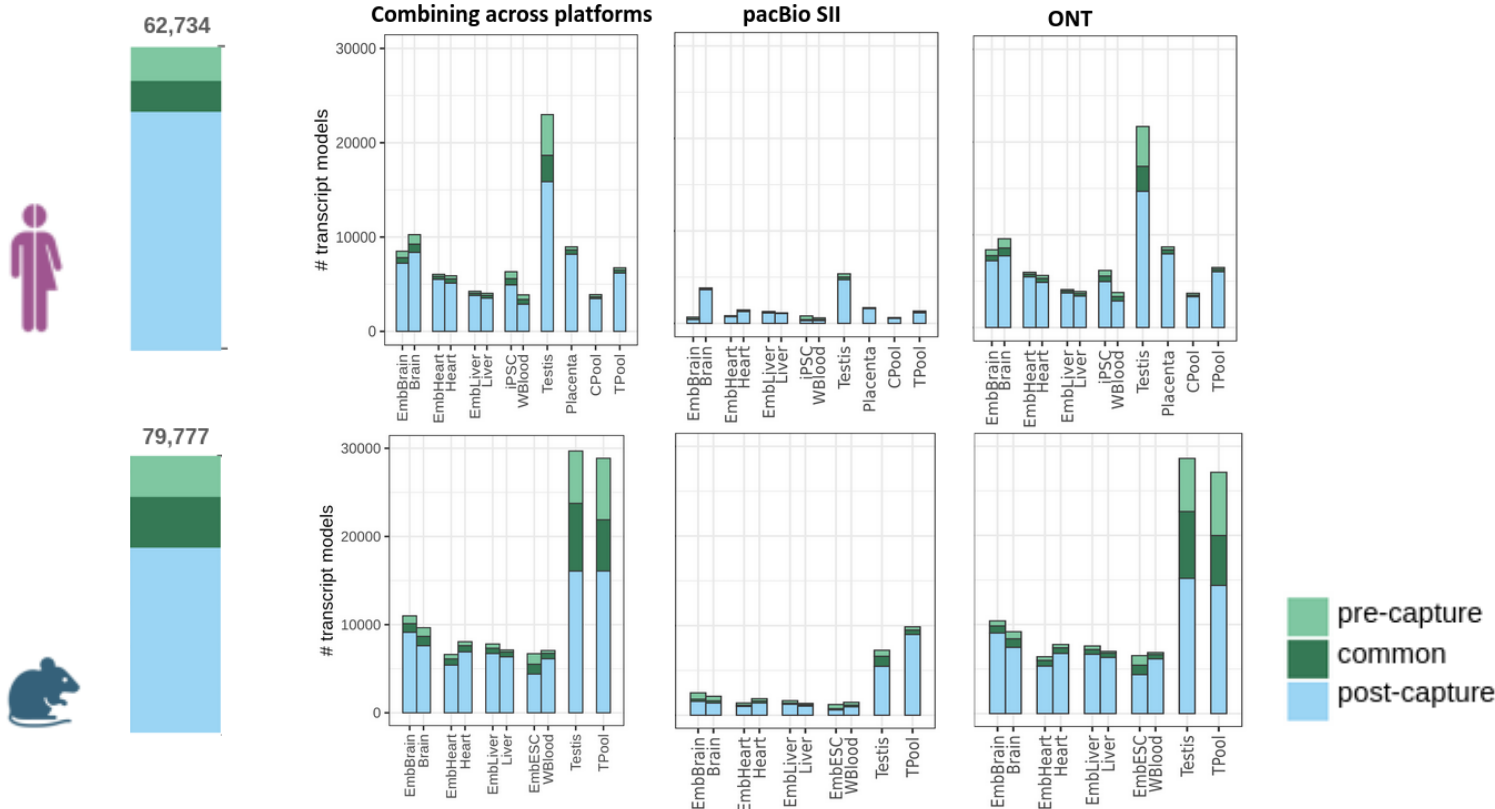

# Fig S8

## A

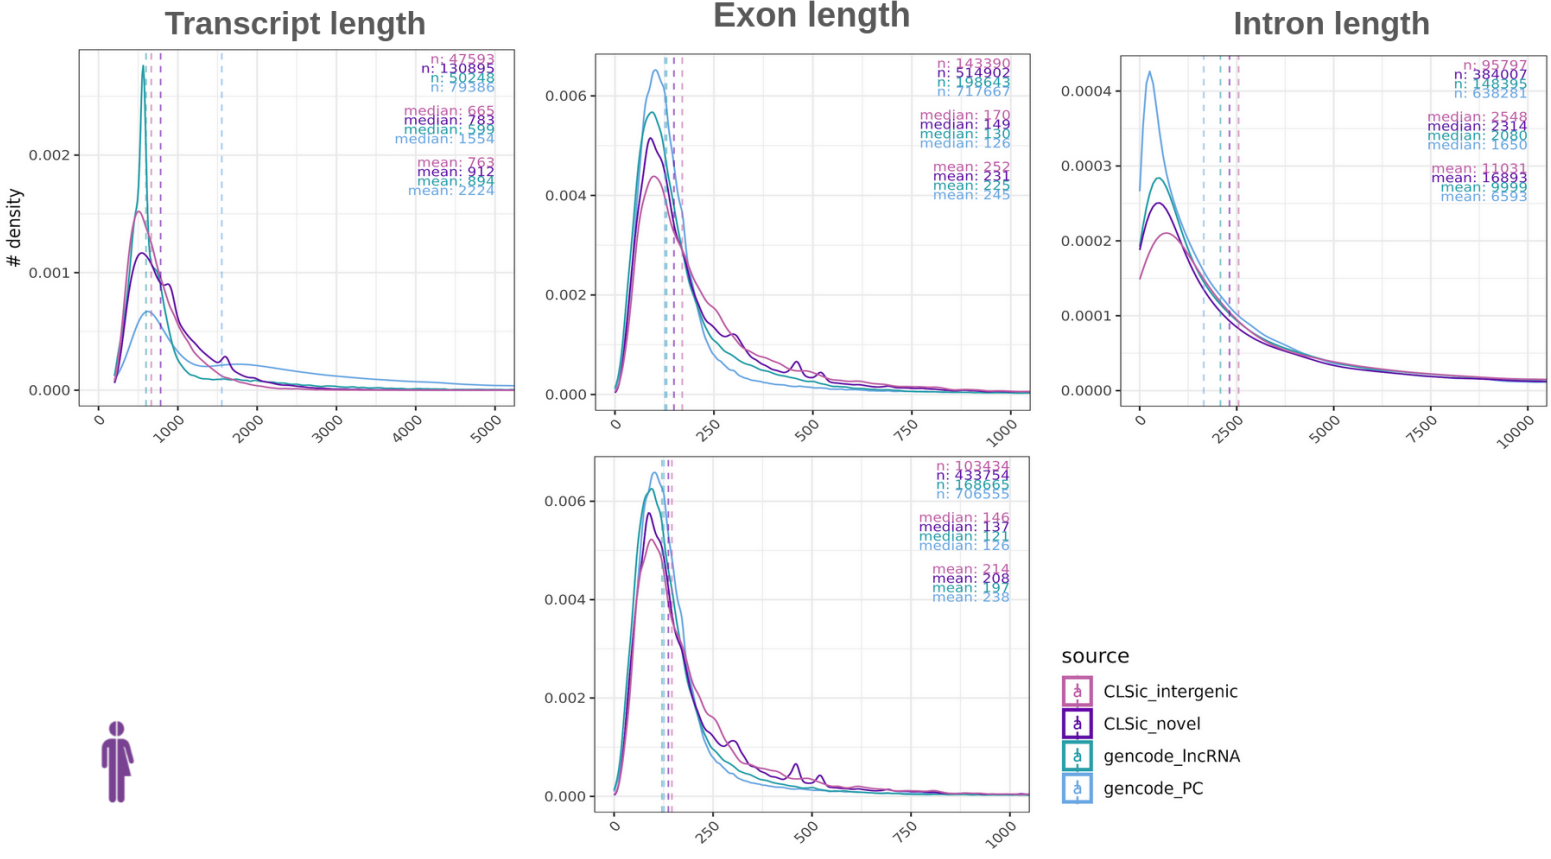

## B

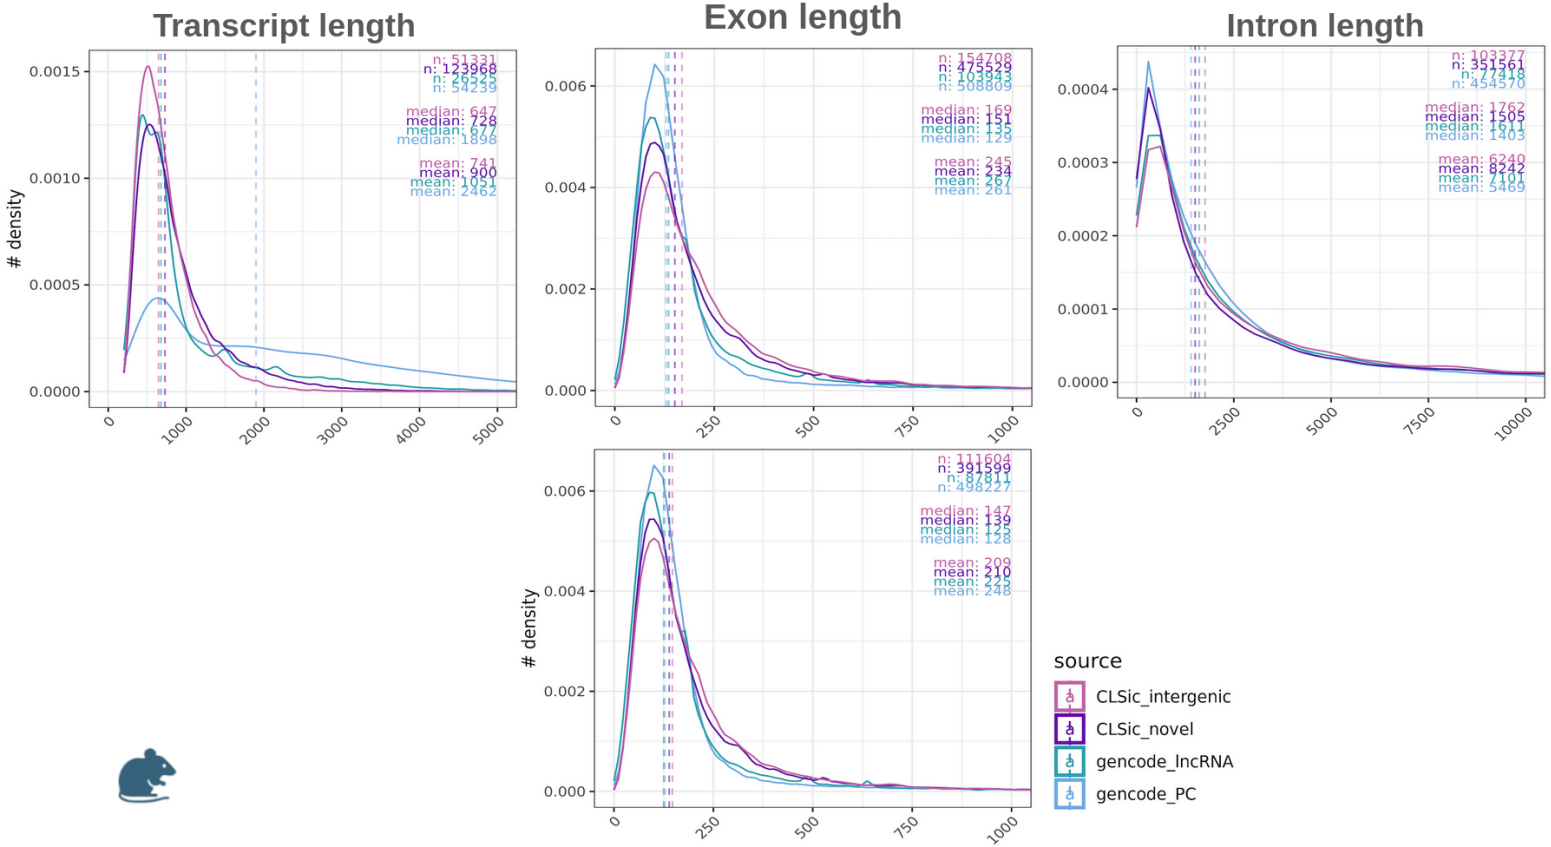



# Fig S9

## A

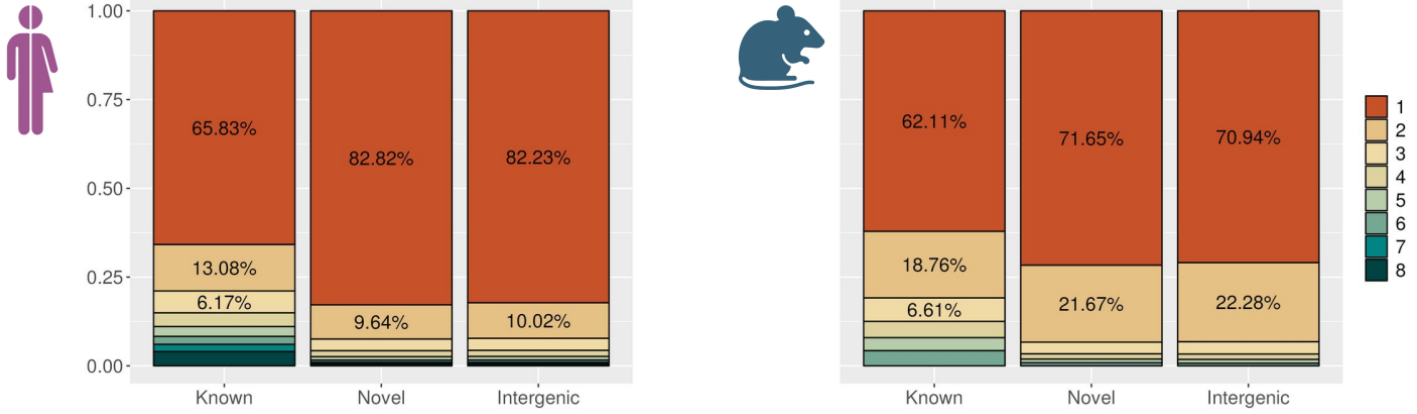

## B

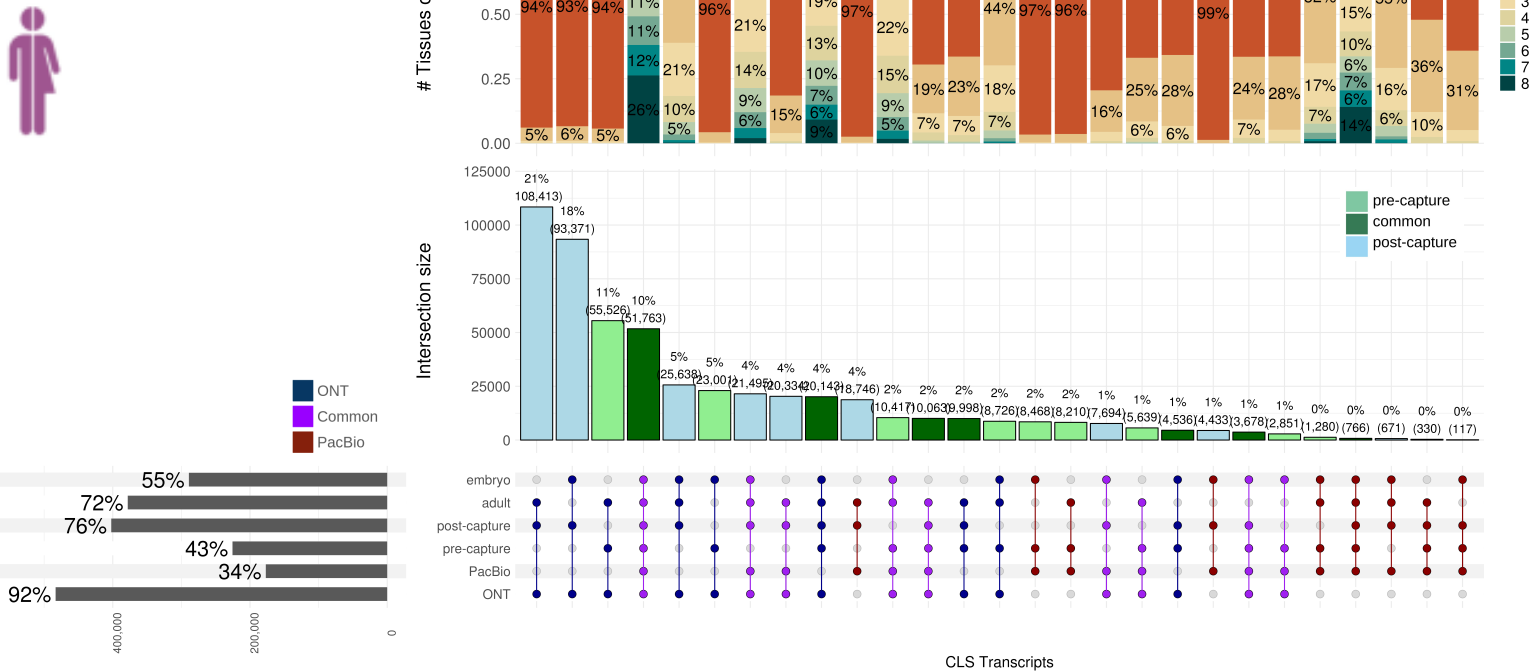

## C

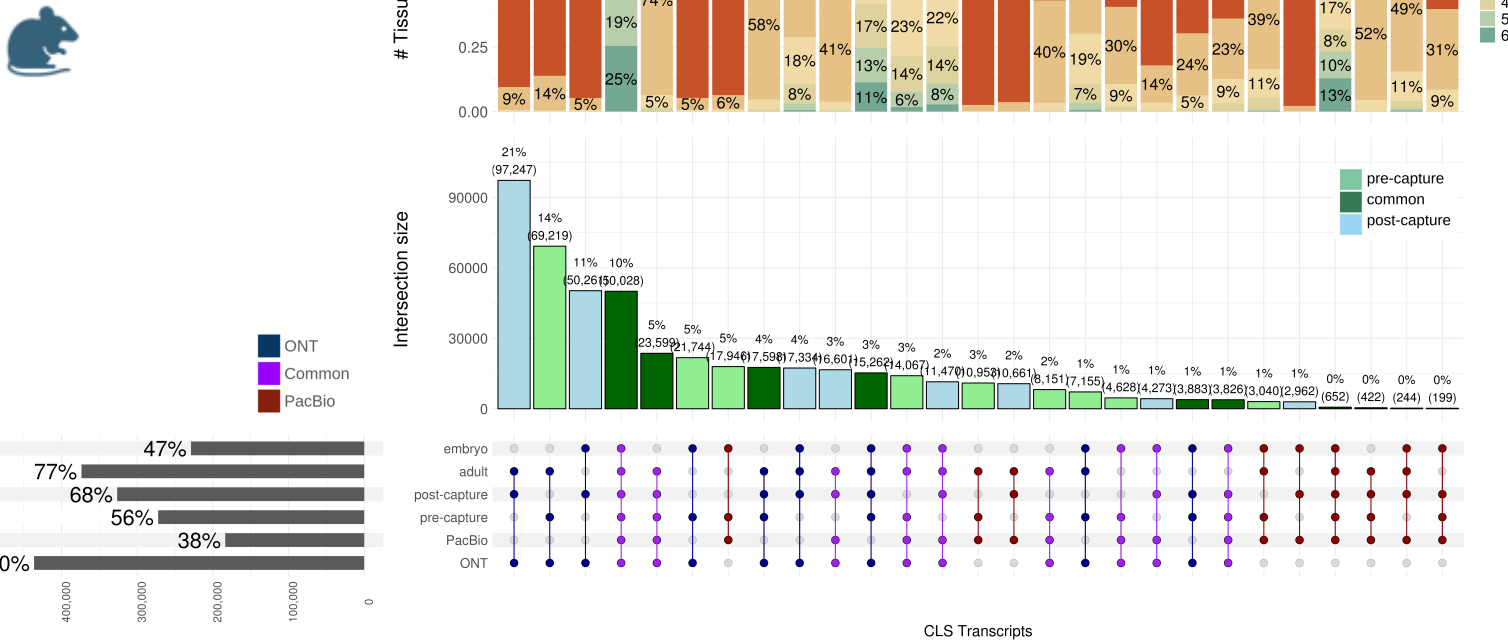

# Fig S10

## A

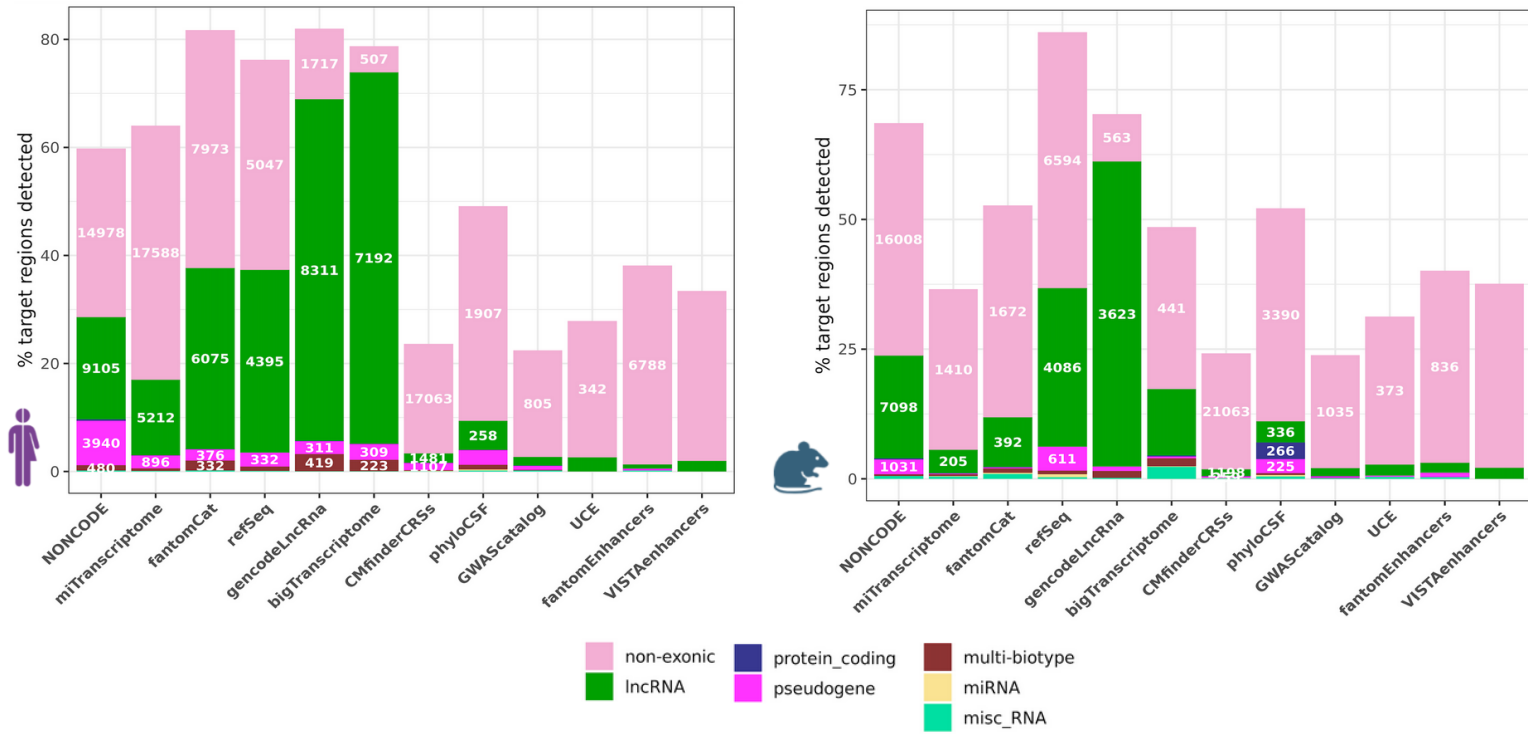

## B

% target regions detected

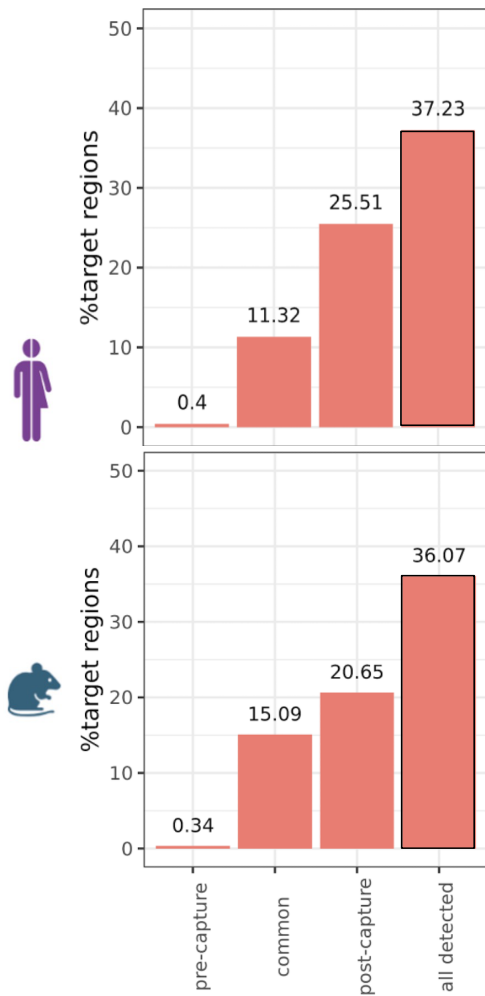

## C

Target regions detected

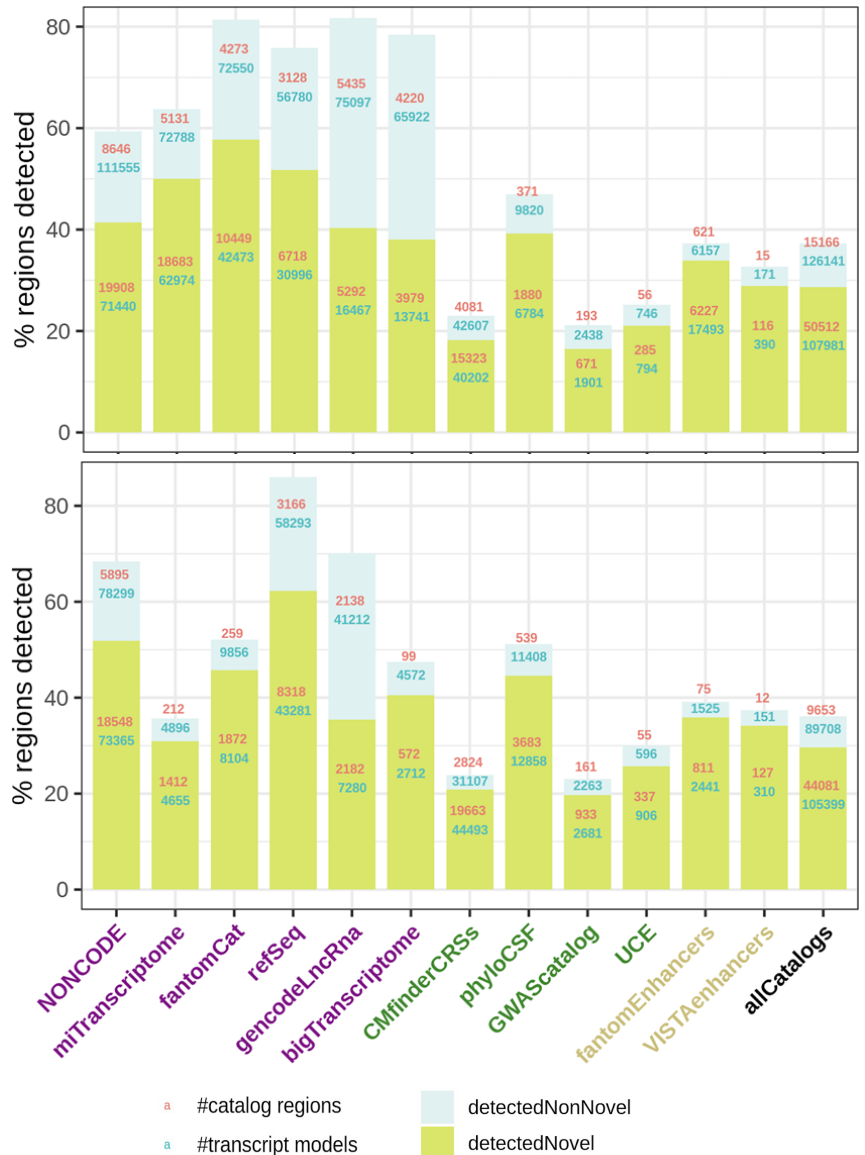

# Fig S11

**A**



|                    |              |              |              |              |             |              |              |             |              |              |              |              |               |
|--------------------|--------------|--------------|--------------|--------------|-------------|--------------|--------------|-------------|--------------|--------------|--------------|--------------|---------------|
| VISTAenhancers     | 119          | 92           | 20           | 35           | 10          | 12           | 49           | 25          | 98           | 17           | 14           | 21           | 390           |
| fantomEnhancers    | 2845         | 3220         | 2116         | 1855         | 1617        | 1507         | 1888         | 1852        | 4810         | 2843         | 1489         | 2668         | 17493         |
| UCE                | 213          | 160          | 34           | 50           | 34          | 21           | 66           | 31          | 264          | 54           | 34           | 47           | 794           |
| GWAScatalog        | 227          | 271          | 230          | 176          | 217         | 141          | 198          | 212         | 589          | 248          | 175          | 200          | 1901          |
| phyloCSF           | 1889         | 1687         | 927          | 758          | 690         | 493          | 1187         | 397         | 1842         | 993          | 556          | 1008         | 6784          |
| CMfinderCRSs       | 6487         | 7114         | 4431         | 3879         | 3388        | 6040         | 4338         | 3544        | 11507        | 5353         | 4501         | 4283         | 40202         |
| bigTranscriptome   | 2500         | 2636         | 1720         | 1332         | 1407        | 1195         | 1908         | 1044        | 4206         | 2277         | 1156         | 2067         | 13741         |
| gencodeLncRna      | 3013         | 3170         | 2207         | 1790         | 1598        | 1291         | 2251         | 1158        | 5569         | 2593         | 1346         | 2313         | 16467         |
| refSeq             | 4221         | 5385         | 3547         | 3152         | 2576        | 2728         | 3112         | 2137        | 11580        | 4266         | 2461         | 3272         | 30996         |
| fantomCat          | 6822         | 8145         | 5211         | 4464         | 3710        | 4826         | 5235         | 4006        | 12596        | 6436         | 4210         | 5312         | 42473         |
| miTranscriptome    | 9127         | 12088        | 6798         | 6071         | 5012        | 5838         | 7122         | 4625        | 19580        | 8891         | 5311         | 7028         | 62974         |
| NONCODE            | 10791        | 12728        | 8146         | 7272         | 6089        | 9874         | 8101         | 6147        | 23060        | 9969         | 7513         | 7789         | 71440         |
| <b>allCatalogs</b> | <b>16278</b> | <b>19096</b> | <b>11735</b> | <b>10275</b> | <b>9069</b> | <b>12752</b> | <b>11546</b> | <b>9086</b> | <b>33877</b> | <b>15049</b> | <b>10043</b> | <b>11762</b> | <b>107981</b> |
| <b>uncaptured</b>  | <b>10345</b> | <b>9814</b>  | <b>6871</b>  | <b>6817</b>  | <b>6123</b> | <b>6052</b>  | <b>8851</b>  | <b>6264</b> | <b>17936</b> | <b>7750</b>  | <b>4615</b>  | <b>6390</b>  | <b>53836</b>  |
|                    | EmbBrain     | Brain        | EmbHeart     | Heart        | EmbLiver    | Liver        | iPSC         | WBlood      | Testis       | Placenta     | TPool        | CPool        | allTissues    |

**B**



|                    |              |              |              |              |              |              |              |              |              |              |               |
|--------------------|--------------|--------------|--------------|--------------|--------------|--------------|--------------|--------------|--------------|--------------|---------------|
| VISTAenhancers     | 140          | 75           | 17           | 23           | 13           | 11           | 23           | 6            | 64           | 51           | 310           |
| fantomEnhancers    | 477          | 427          | 401          | 521          | 339          | 281          | 205          | 392          | 616          | 668          | 2441          |
| UCE                | 367          | 189          | 54           | 56           | 46           | 56           | 42           | 50           | 231          | 206          | 906           |
| GWAScatalog        | 437          | 379          | 341          | 390          | 365          | 284          | 219          | 363          | 727          | 786          | 2681          |
| phyloCSF           | 3049         | 2438         | 1691         | 1948         | 1882         | 1832         | 1242         | 3304         | 2606         | 4095         | 12858         |
| CMfinderCRSs       | 8737         | 7289         | 5352         | 6657         | 5596         | 5057         | 3708         | 5660         | 12172        | 12969        | 44493         |
| bigTranscriptome   | 858          | 644          | 481          | 366          | 448          | 374          | 374          | 335          | 525          | 678          | 2712          |
| gencodeLncRna      | 1679         | 1350         | 1125         | 861          | 1047         | 984          | 986          | 813          | 2088         | 2043         | 7280          |
| refSeq             | 6680         | 6259         | 4872         | 4164         | 5510         | 4798         | 3241         | 4822         | 14623        | 13408        | 43281         |
| fantomCat          | 2189         | 1711         | 1354         | 1427         | 1429         | 1237         | 995          | 1562         | 1859         | 2457         | 8104          |
| miTranscriptome    | 1313         | 1073         | 626          | 667          | 588          | 502          | 405          | 565          | 1167         | 1321         | 4655          |
| NONCODE            | 10385        | 9761         | 7582         | 7597         | 8040         | 8770         | 5392         | 7803         | 28819        | 25339        | 73365         |
| <b>allCatalogs</b> | <b>16965</b> | <b>14769</b> | <b>11226</b> | <b>12531</b> | <b>12730</b> | <b>12043</b> | <b>8085</b>  | <b>13127</b> | <b>35143</b> | <b>34055</b> | <b>105399</b> |
| <b>uncaptured</b>  | <b>12658</b> | <b>10992</b> | <b>9220</b>  | <b>6831</b>  | <b>8125</b>  | <b>6084</b>  | <b>11946</b> | <b>6990</b>  | <b>26397</b> | <b>26694</b> | <b>73575</b>  |
|                    | EmbBrain     | Brain        | EmbHeart     | Heart        | EmbLiver     | Liver        | EmbSC        | WBlood       | Testis       | TPool        | allTissues    |

**C**



|                    |            |            |          |            |            |            |            |            |             |            |            |            |             |
|--------------------|------------|------------|----------|------------|------------|------------|------------|------------|-------------|------------|------------|------------|-------------|
| VISTAenhancers     | 11.7       | 7.7        | 2.5      | 2.7        | 1.2        | 1.7        | 4.7        | 1.2        | 15.5        | 2.5        | 3          | 3.2        | 28.9        |
| fantomEnhancers    | 9.4        | 9.3        | 6.9      | 6.2        | 5.8        | 5.6        | 6          | 6          | 12.4        | 8.8        | 6.4        | 9.4        | 33.8        |
| UCE                | 7.7        | 5          | 1.7      | 1.3        | 1.1        | 1.3        | 2.5        | 1.1        | 10.6        | 1.9        | 1.8        | 1.6        | 21          |
| GWAScatalog        | 3.7        | 3.4        | 3.1      | 2.7        | 2.5        | 2.2        | 2          | 2.5        | 7           | 3.9        | 2.6        | 3.2        | 16.5        |
| phyloCSF           | 19         | 17         | 10.4     | 9.5        | 8.3        | 6.9        | 11.7       | 5.2        | 20.6        | 9.6        | 8.7        | 9.6        | 39.2        |
| CMfinderCRSs       | 5.4        | 5.4        | 3.5      | 3.2        | 2.6        | 2.4        | 3.4        | 2          | 8.2         | 3.8        | 2.9        | 3.4        | 18.2        |
| bigTranscriptome   | 12.3       | 13.8       | 10.1     | 8.8        | 7.7        | 7          | 9.6        | 5.9        | 21.5        | 10.6       | 8.5        | 9.7        | 38.1        |
| gencodeLncRna      | 12.9       | 14.2       | 10.8     | 9.3        | 8.1        | 7.1        | 9.8        | 5.8        | 23.5        | 10.7       | 8.6        | 9.5        | 40.3        |
| refSeq             | 14.9       | 17.1       | 12.6     | 11.6       | 9.7        | 8.8        | 10.3       | 7.4        | 33.3        | 13.2       | 11.4       | 10.7       | 51.8        |
| fantomCat          | 19.8       | 22.1       | 16.2     | 14.5       | 12.4       | 11.4       | 15.1       | 10.3       | 30.6        | 17.7       | 14.6       | 16.4       | 57.7        |
| miTranscriptome    | 14.8       | 17.1       | 11.2     | 10.2       | 8.5        | 7.8        | 10.5       | 6.1        | 25.3        | 13         | 10.2       | 11.4       | 50          |
| NONCODE            | 13.3       | 14.4       | 10.3     | 9.6        | 8          | 7.5        | 9.9        | 6.1        | 23.8        | 11.3       | 9.1        | 9.8        | 41.4        |
| <b>allCatalogs</b> | <b>8.3</b> | <b>8.8</b> | <b>6</b> | <b>5.5</b> | <b>4.7</b> | <b>4.3</b> | <b>5.6</b> | <b>3.7</b> | <b>14.1</b> | <b>6.8</b> | <b>5.2</b> | <b>6.1</b> | <b>28.6</b> |
|                    | EmbBrain   | Brain      | EmbHeart | Heart      | EmbLiver   | Liver      | iPSC       | WBlood     | Testis      | Placenta   | TPool      | CPool      |             |

**D**



|                    |             |            |            |            |            |            |            |            |             |           |             |
|--------------------|-------------|------------|------------|------------|------------|------------|------------|------------|-------------|-----------|-------------|
| VISTAenhancers     | 21          | 10.2       | 4          | 4.3        | 2.2        | 2.2        | 2.7        | 1.6        | 8.3         | 8.6       | 34.1        |
| fantomEnhancers    | 12.7        | 10.9       | 8.3        | 13         | 9          | 6.7        | 5.4        | 8.3        | 9.2         | 15        | 35.9        |
| UCE                | 15.2        | 8.6        | 3          | 3.1        | 2.2        | 1.9        | 2.1        | 1.6        | 7.3         | 7.6       | 25.8        |
| GWAScatalog        | 5.8         | 4.8        | 3.8        | 4.9        | 4.7        | 3.5        | 2.4        | 3.9        | 6           | 8.4       | 19.7        |
| phyloCSF           | 23.7        | 18.6       | 12.2       | 15.4       | 12.2       | 10.6       | 9.8        | 10.2       | 16.7        | 22.3      | 44.6        |
| CMfinderCRSs       | 7.7         | 6          | 4.3        | 5.8        | 4.4        | 3.4        | 3          | 3.2        | 6.5         | 8.6       | 20.8        |
| bigTranscriptome   | 21.6        | 17.7       | 12.9       | 14.5       | 13.1       | 11.5       | 9.3        | 10.4       | 15.2        | 22.7      | 40.5        |
| gencodeLncRna      | 14.6        | 12.4       | 10         | 9.3        | 10.2       | 7.6        | 7.5        | 7.3        | 15.9        | 18.5      | 35.5        |
| refSeq             | 25.4        | 23.2       | 16.6       | 14.6       | 17.4       | 12.7       | 10.9       | 12.5       | 31          | 37.4      | 62.3        |
| fantomCat          | 24.1        | 19.7       | 15.7       | 20         | 16.7       | 13.7       | 11.3       | 13.4       | 17.7        | 25.5      | 45.7        |
| miTranscriptome    | 14.5        | 12.2       | 8.1        | 9.5        | 7.1        | 5.9        | 5.4        | 5.5        | 10.7        | 14.3      | 31          |
| NONCODE            | 17.8        | 15.9       | 11.6       | 11.7       | 12         | 10         | 8.2        | 9          | 30.6        | 32.9      | 51.9        |
| <b>allCatalogs</b> | <b>10.7</b> | <b>8.8</b> | <b>6.4</b> | <b>7.4</b> | <b>6.6</b> | <b>5.2</b> | <b>4.5</b> | <b>5.1</b> | <b>12.6</b> | <b>15</b> | <b>29.6</b> |
|                    | EmbBrain    | Brain      | EmbHeart   | Heart      | EmbLiver   | Liver      | EmbSC      | WBlood     | Testis      | TPool     |             |

# Fig S12

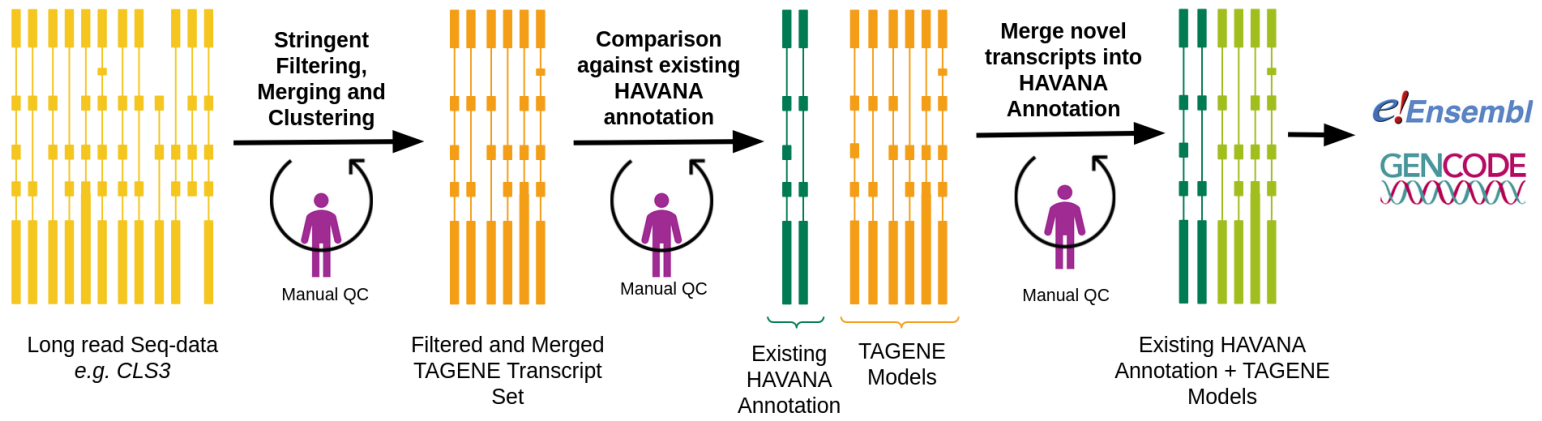

# Fig S13

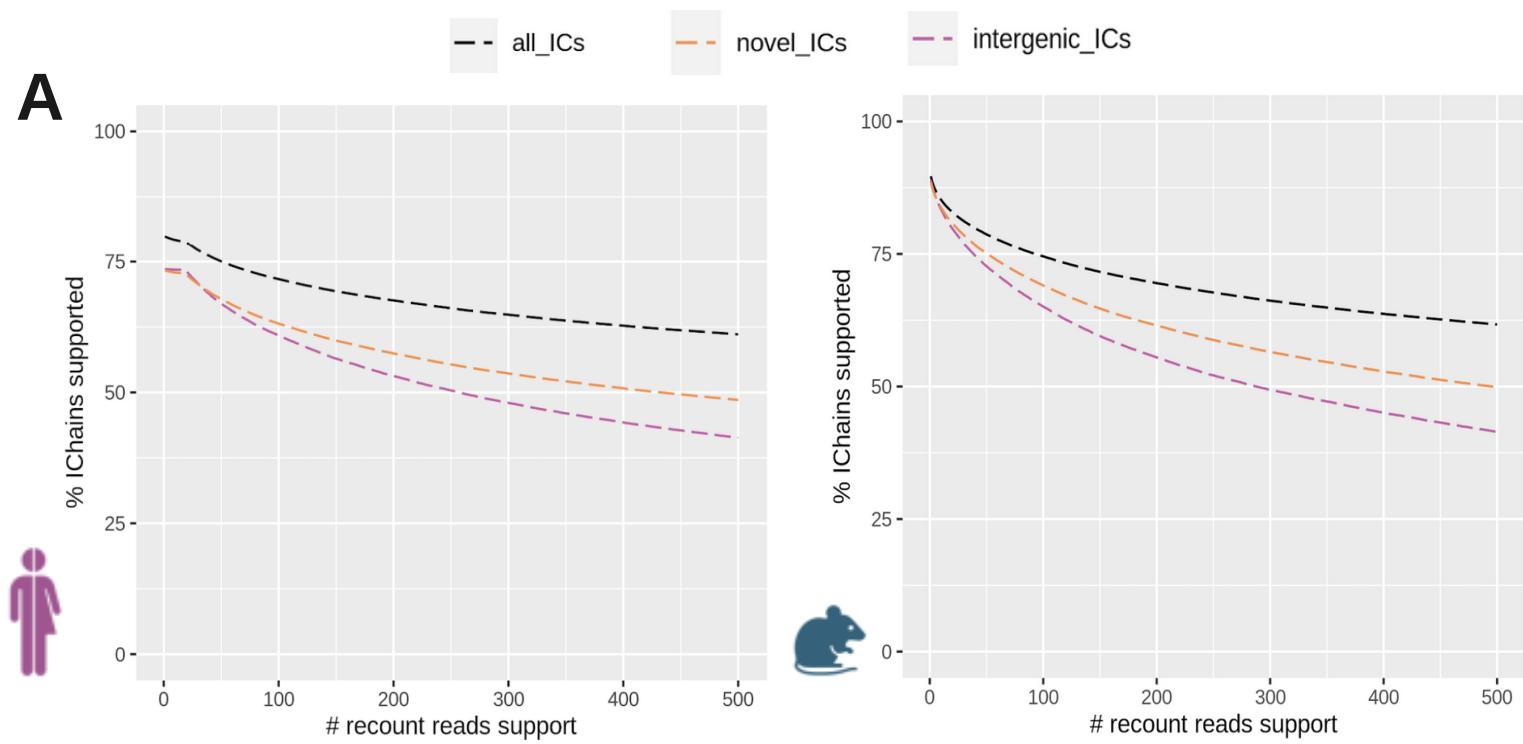

**Fig S14**

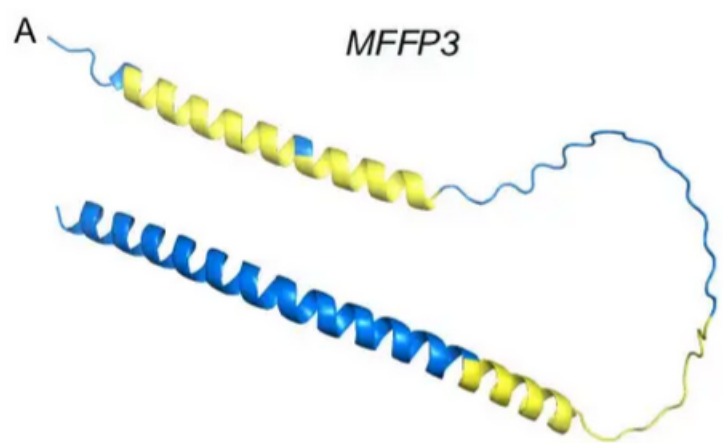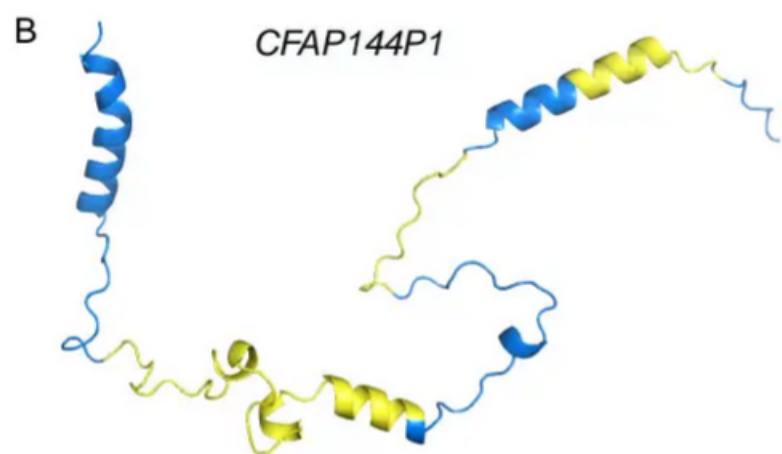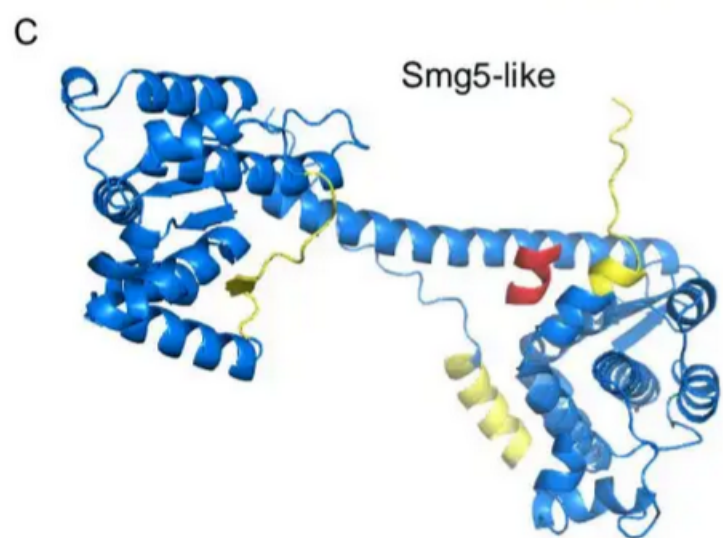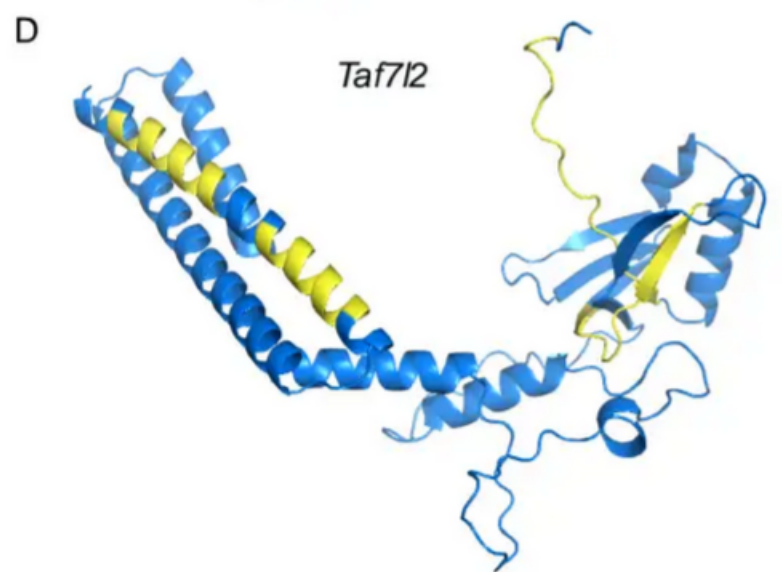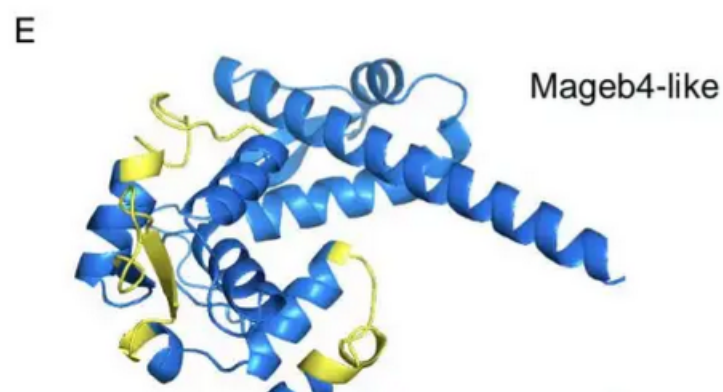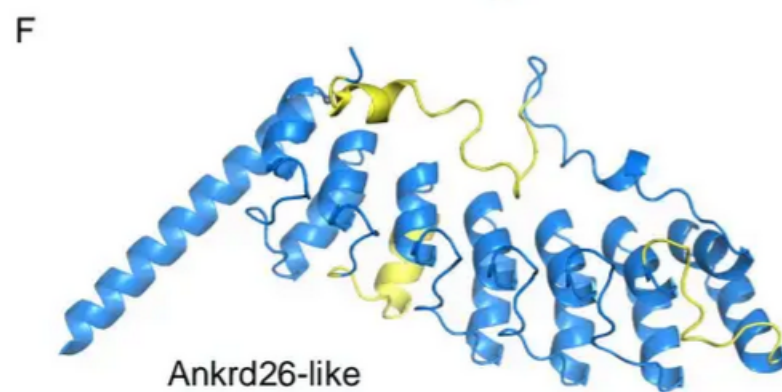

# Fig S15

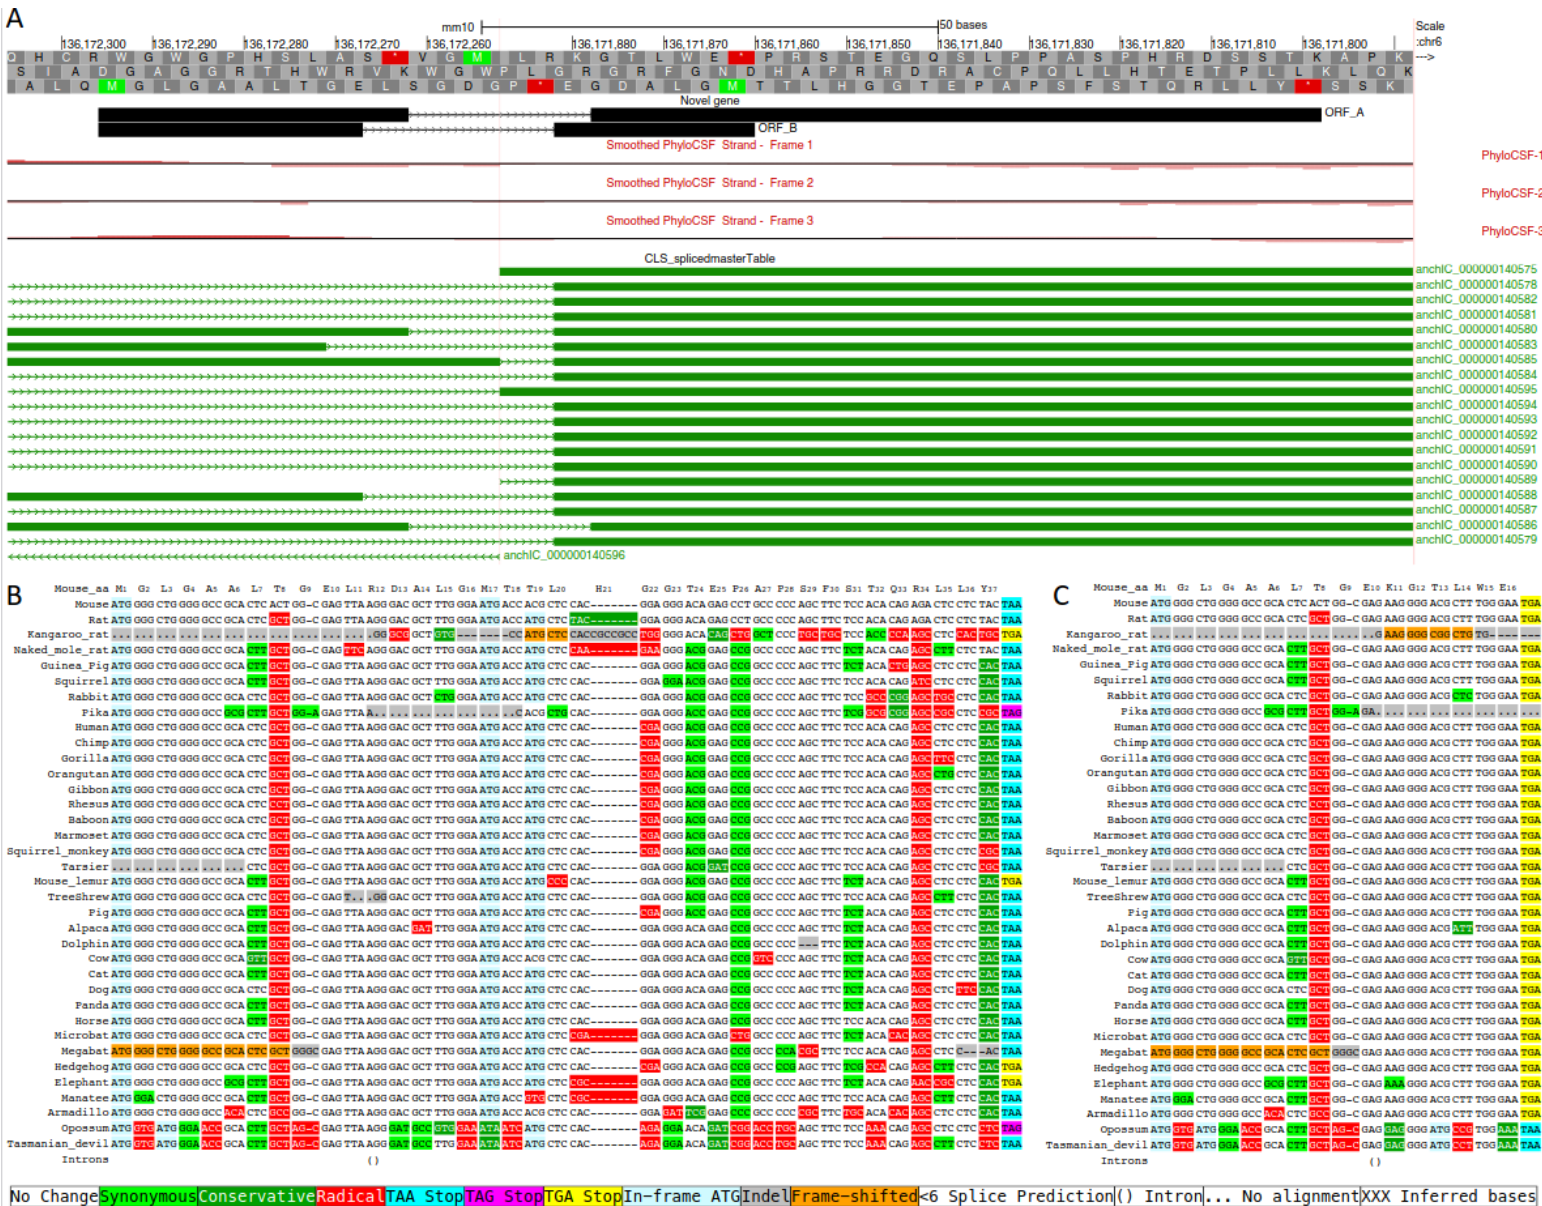

# Fig S16

## A

### # of upregulated genes

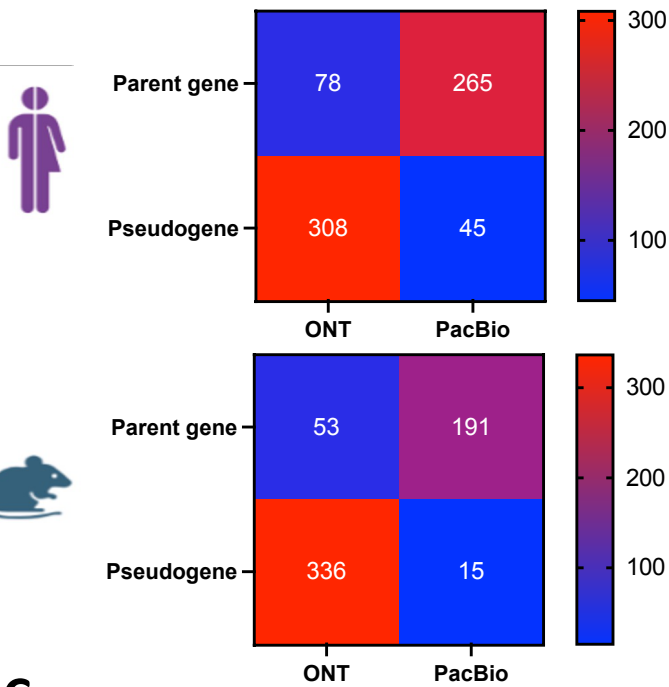

## B

### # of upregulated pseudogenes

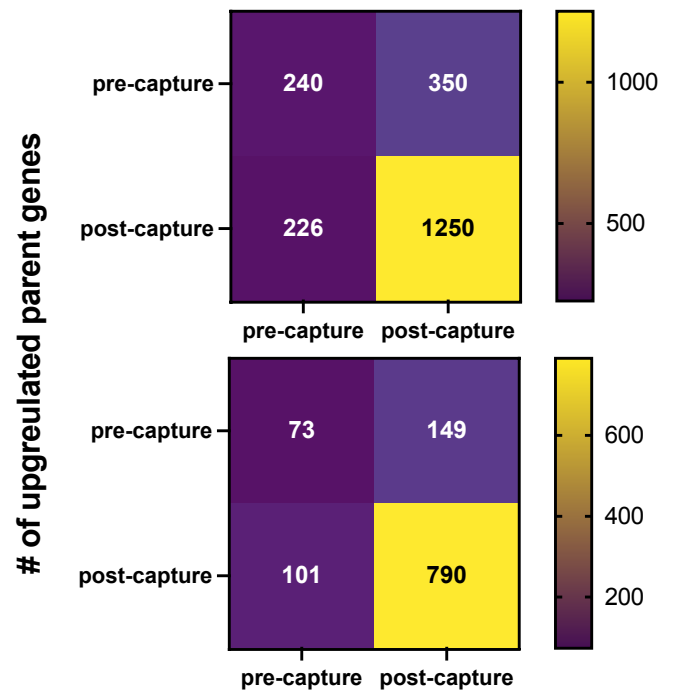

## C

### Pseudogene

### Parent gene

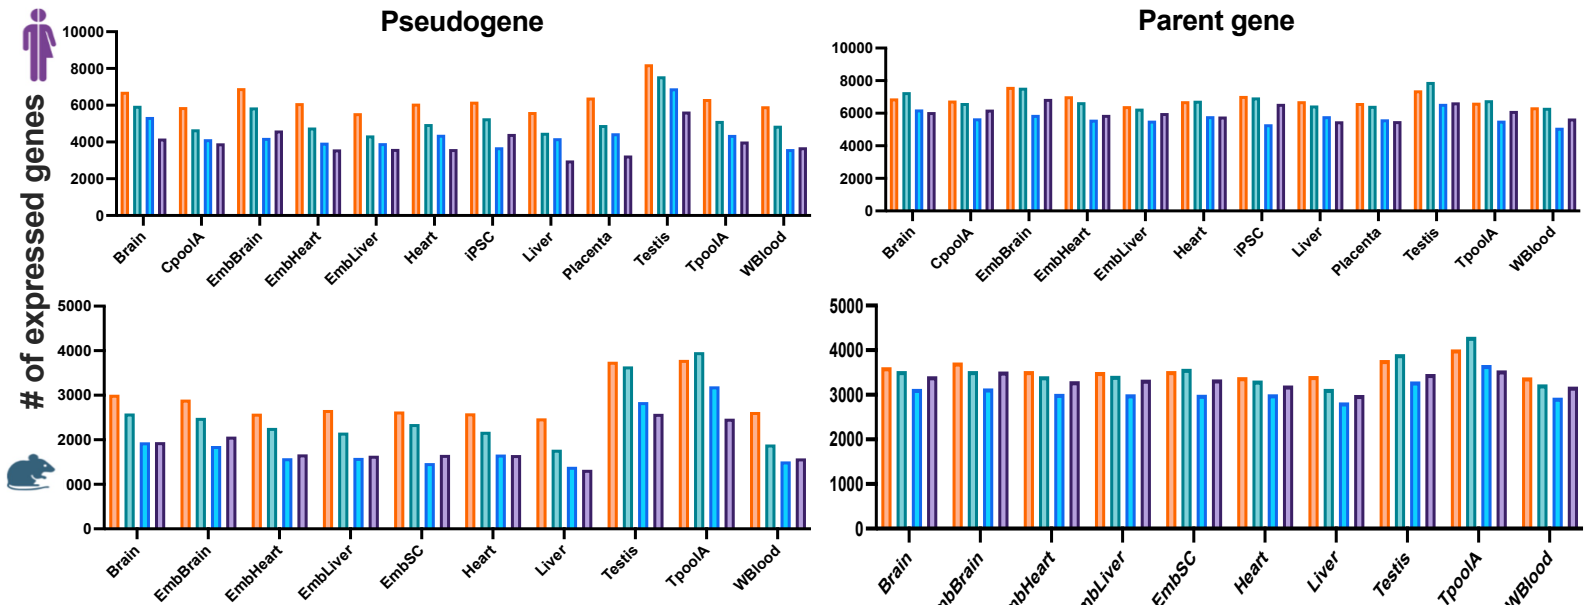

## D ONT vs PacBio

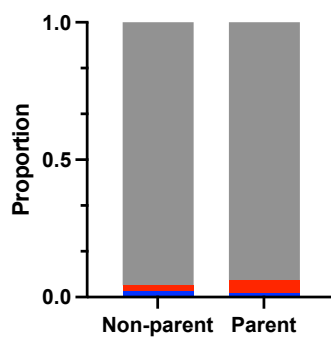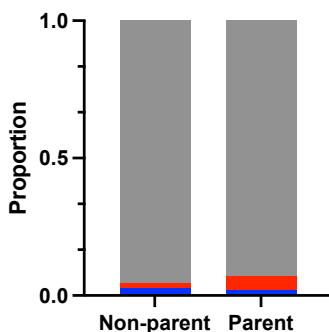

## E pre-capture vs post-capture

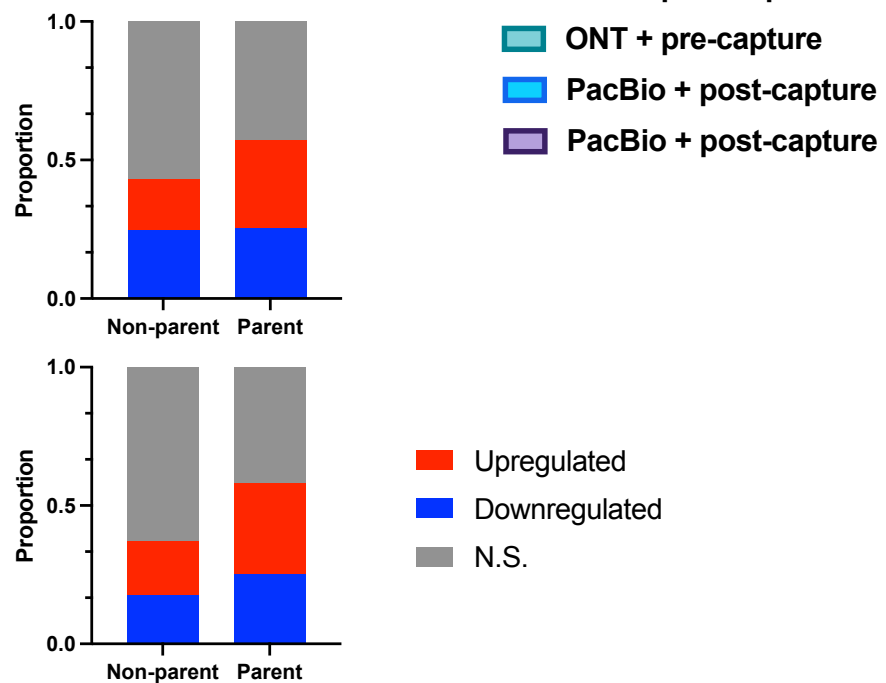



A

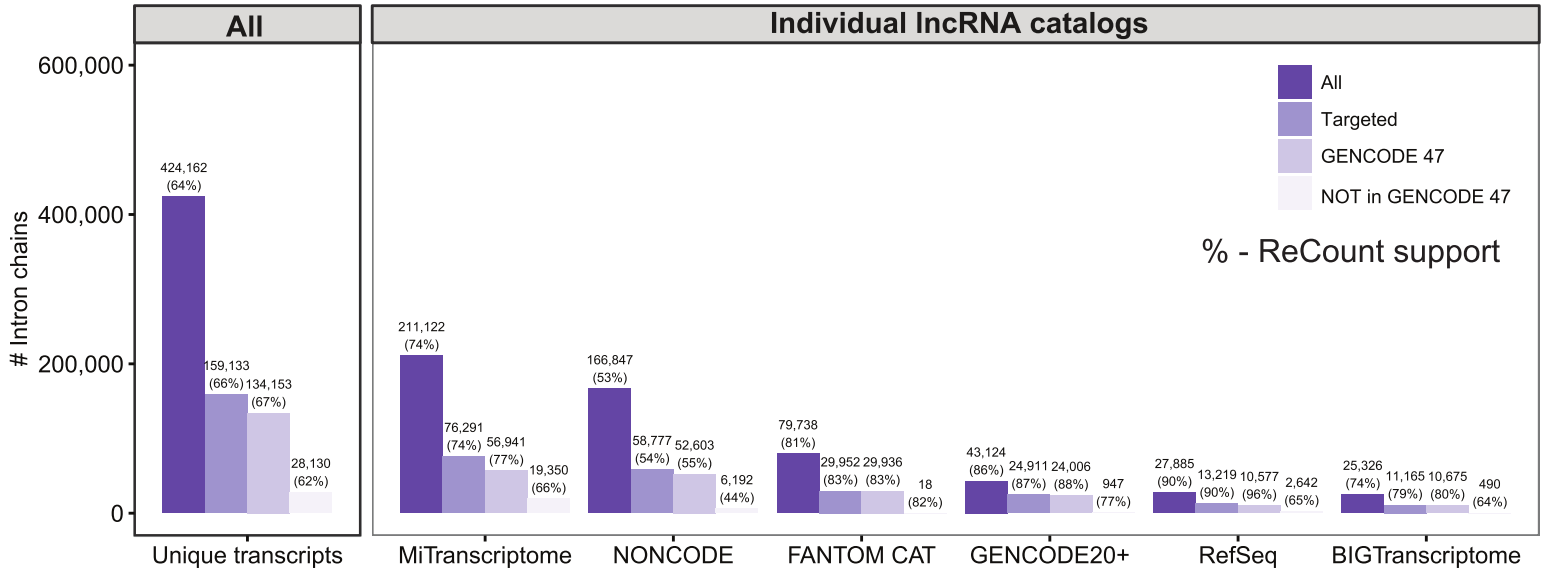

B

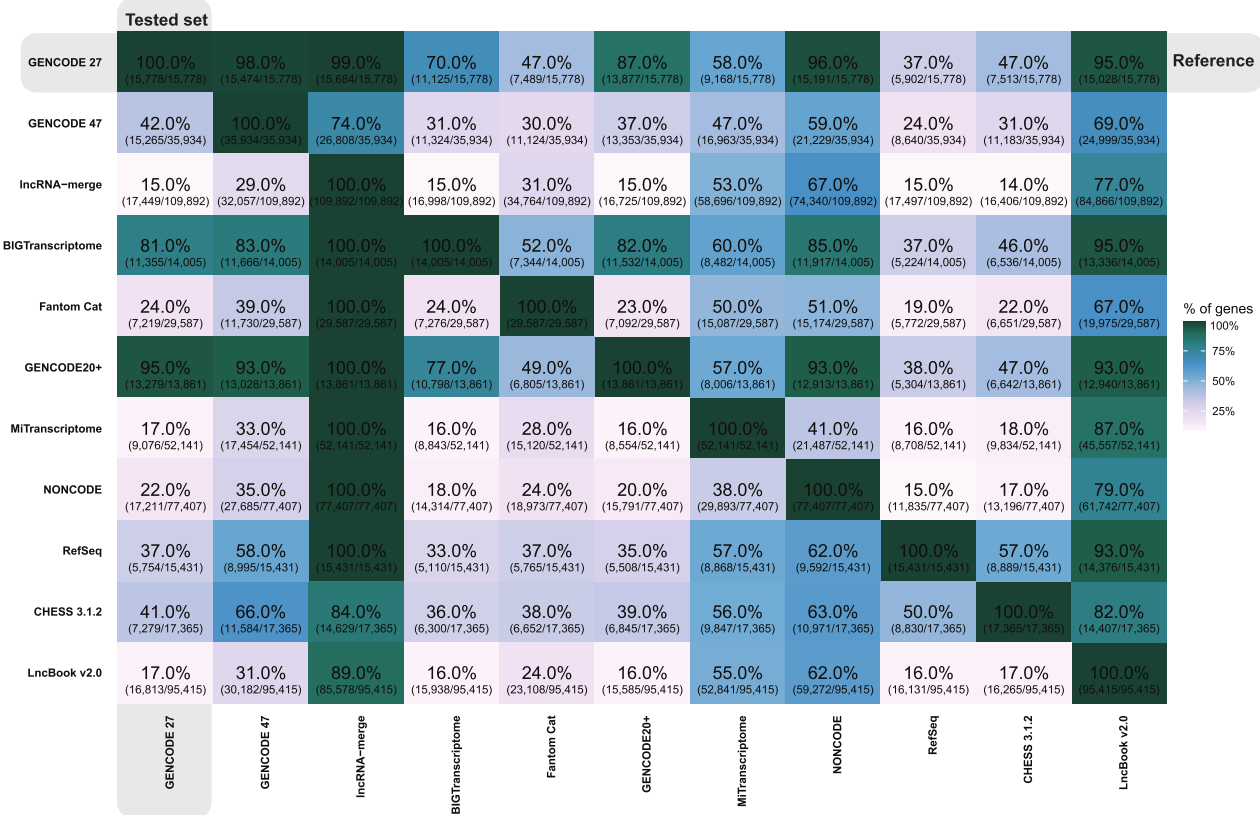

C

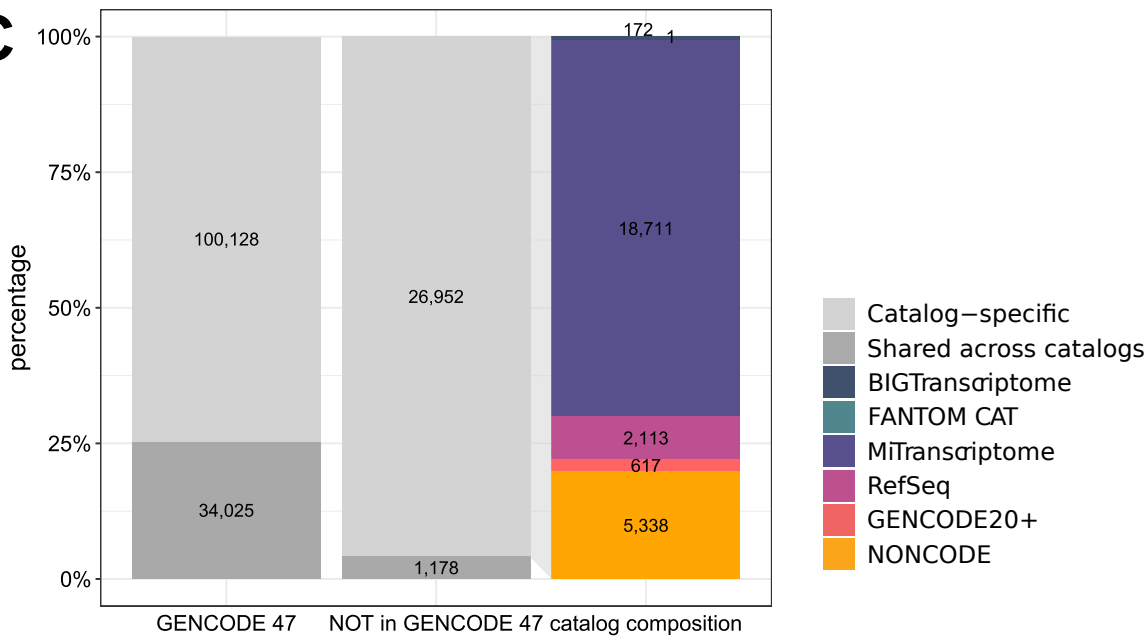

# Fig S18

## A

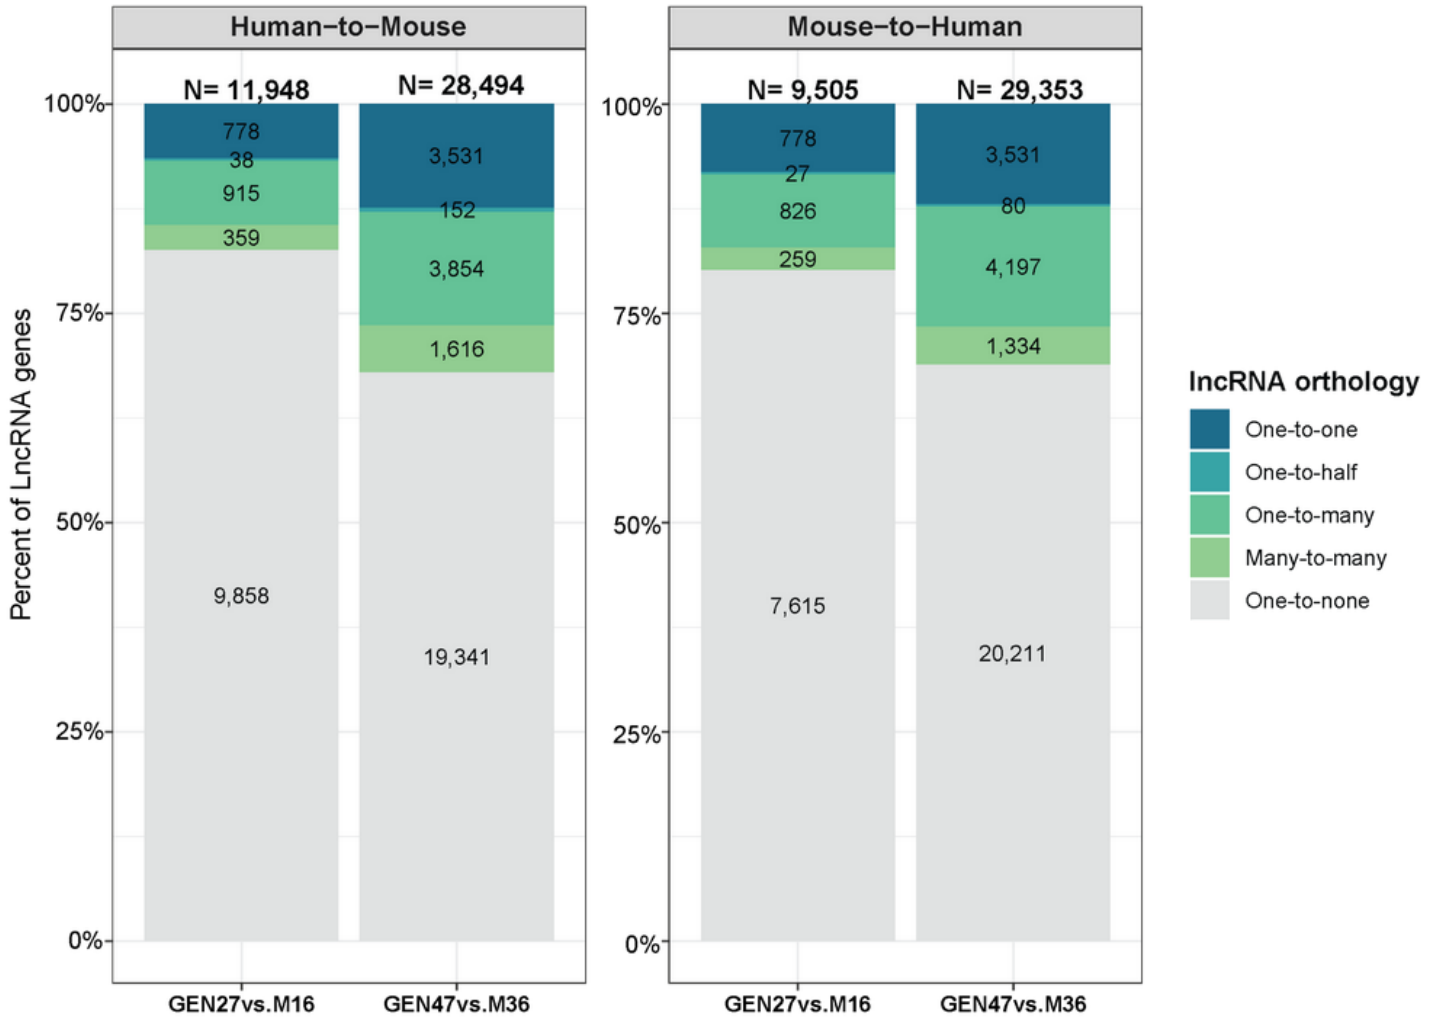

## B

### Gene orthology predictions (Negative controls - lncRNAs)

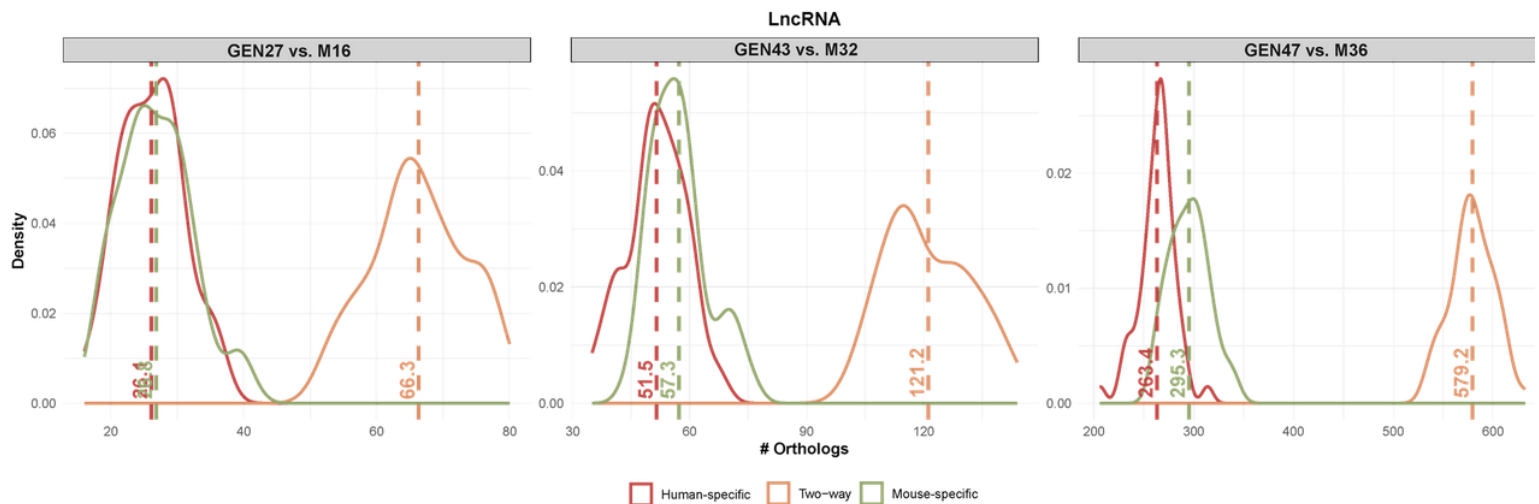

# Fig S19

## A

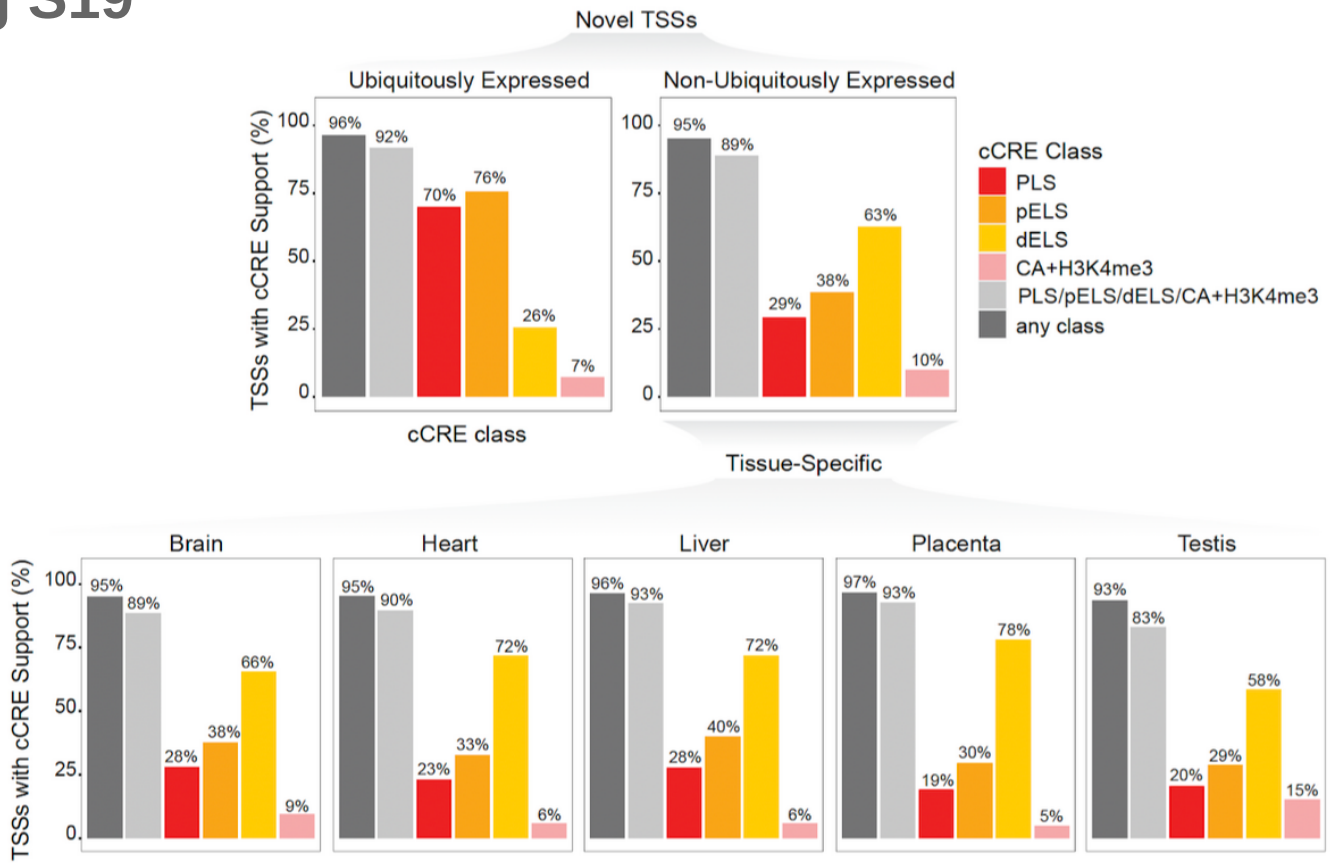

## B

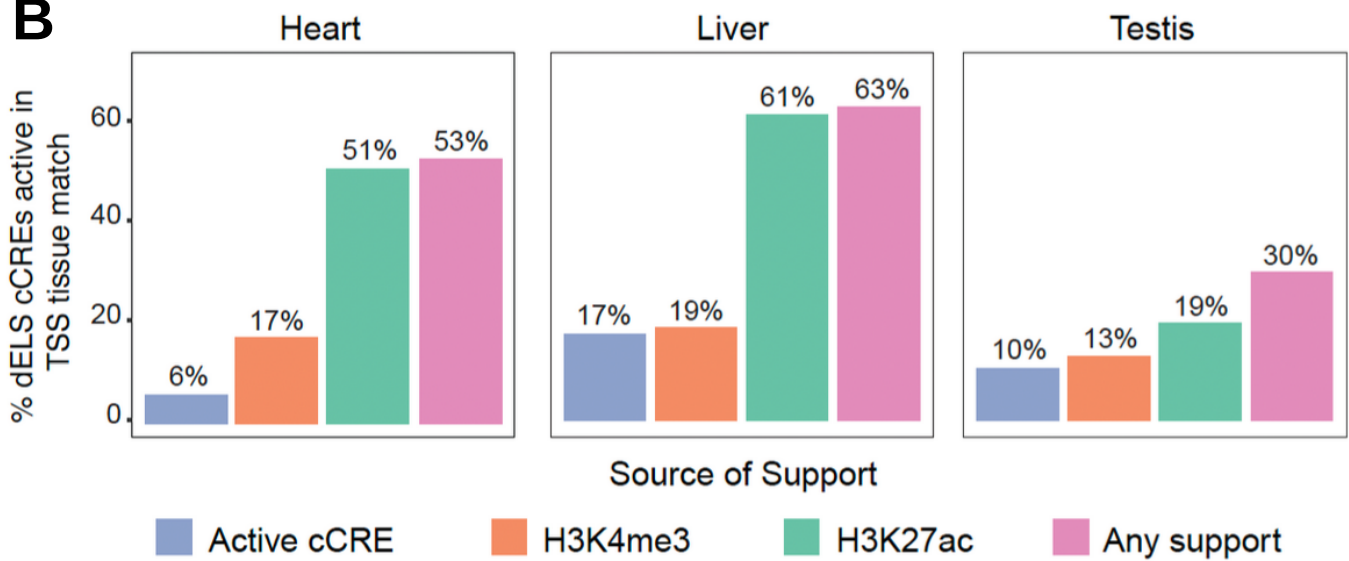

## C

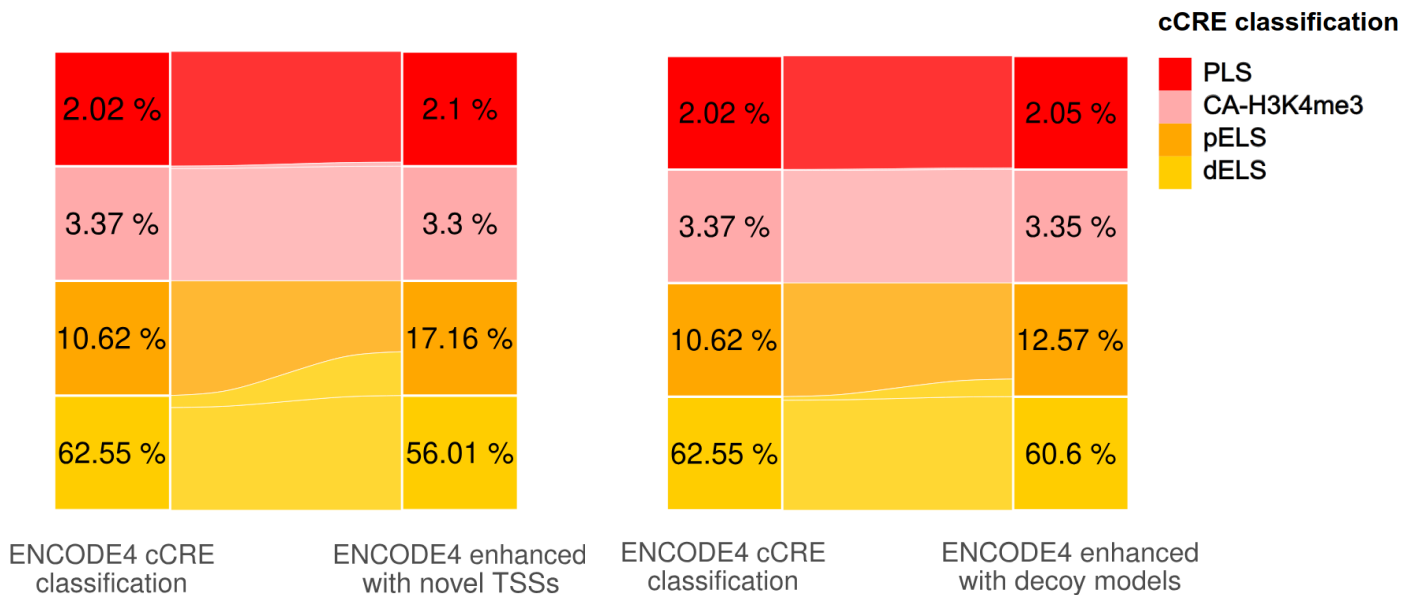

# Fig S20

**A**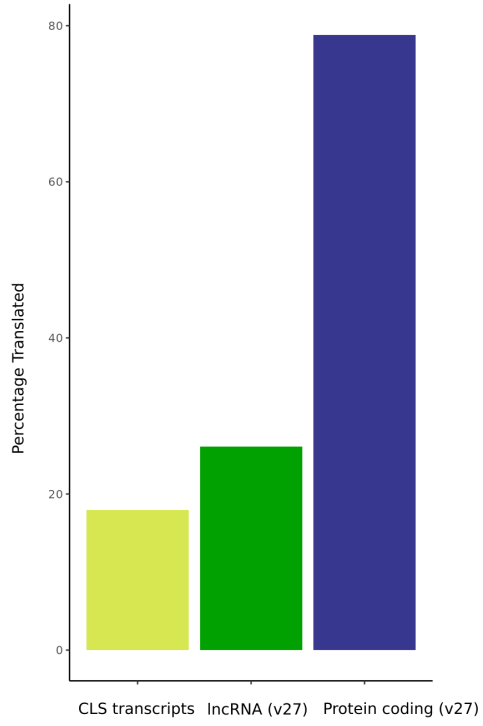**B**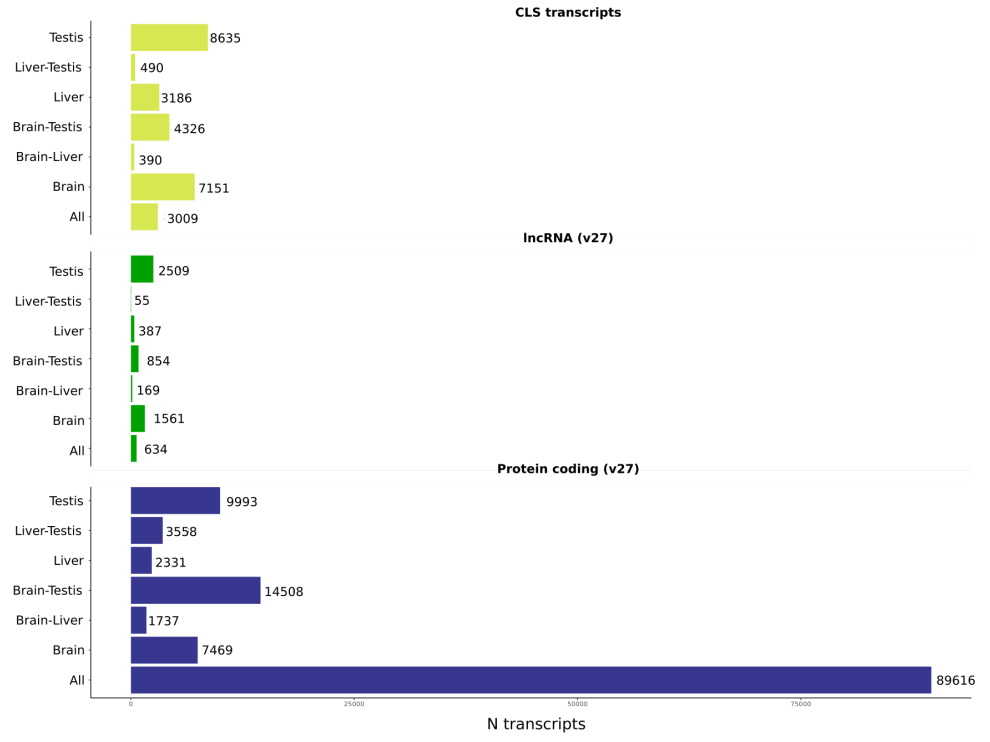

# Fig S21

## A

Reference

|                            |             |
|----------------------------|-------------|
| protein-coding (v27):      | 5.54, 12.78 |
| lncRNAs (v27):             | 4.64, 8.95  |
| inergenic CLS transcripts: | 4.71, 10.03 |
| decoy models:              | 3.41, 5.21  |

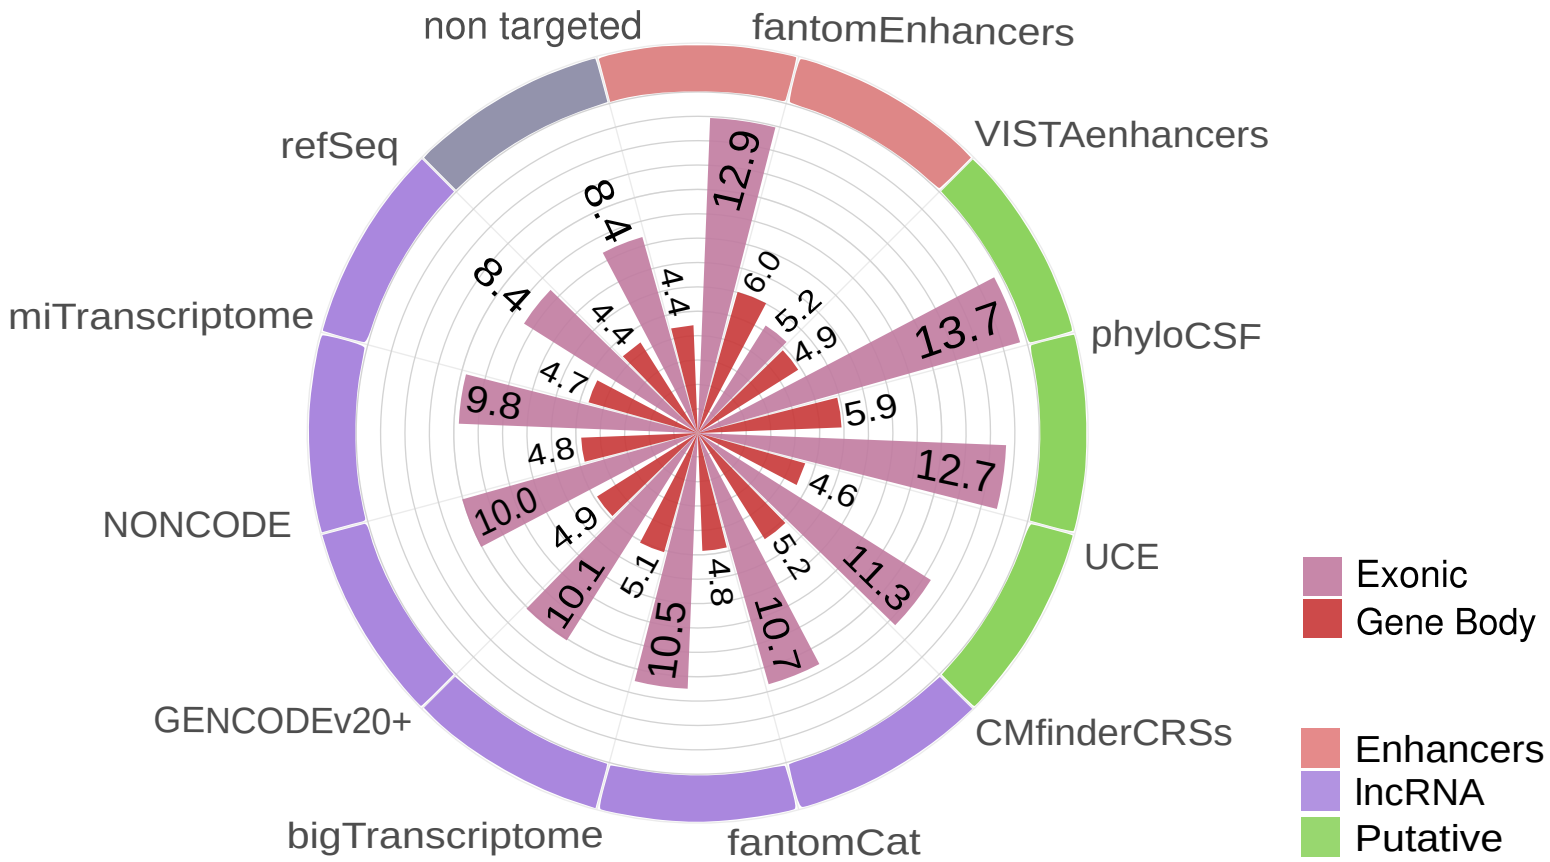

## B

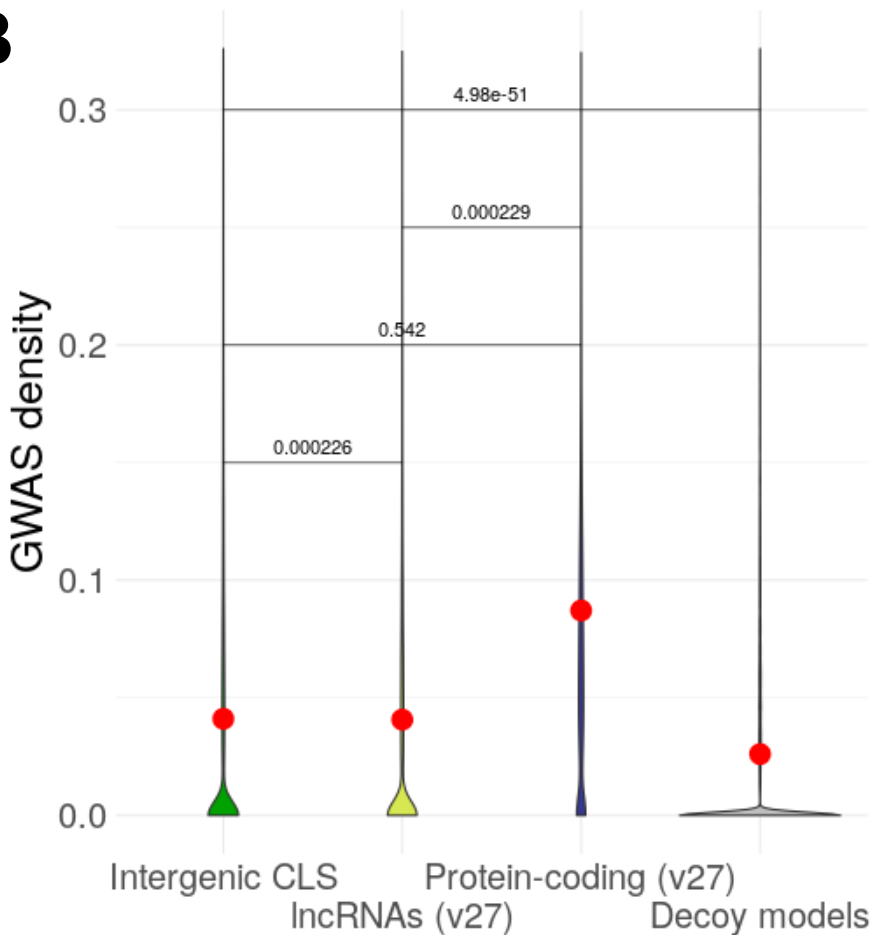

# Fig S22

## A

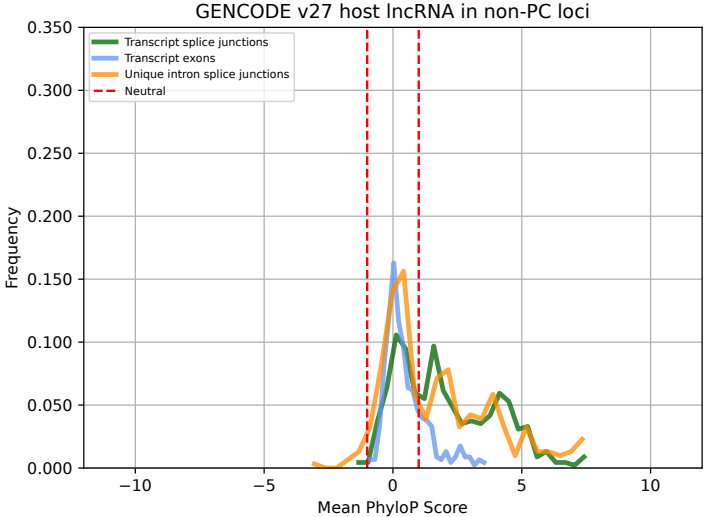

## B

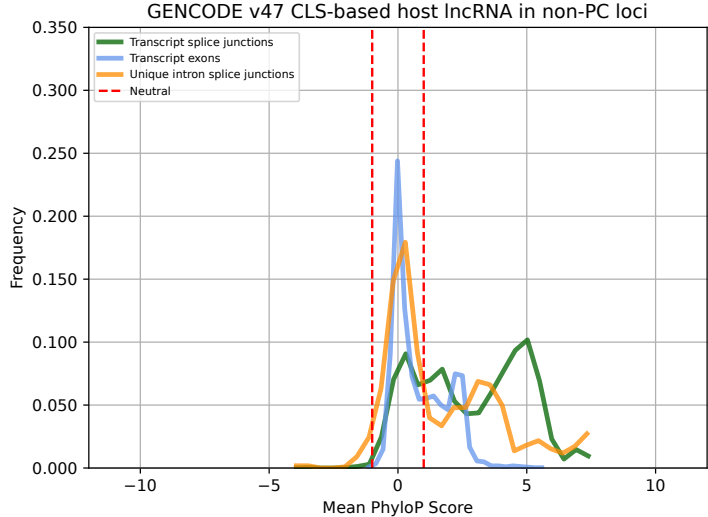

Supplement: media-2.pdf [file media-2.pdf]
